# Supplementary material for: Alterations in co-abundant bacteriome in colorectal cancer and its persistence after surgery: a pilot study
Source: Sci Rep. 2022 Jun 14;12:9829. doi: 10.1038/s41598-022-14203-z (PMC9198081; doi:10.1038/s41598-022-14203-z)
Supplement: Supplementary file 5 — Supplementary Information 3. [file 41598_2022_14203_MOESM5_ESM.xlsx]

## Sheet: PATHWAY
S/N	PATHWAYS	KOs
1	map01100 Metabolic pathways (15)	ko:K00392 sir; sulfite reductase (ferredoxin) [EC:1.8.7.1]
		ko:K00486 KMO; kynurenine 3-monooxygenase [EC:1.14.13.9]
		ko:K00639 kbl; glycine C-acetyltransferase [EC:2.3.1.29]
		ko:K00841 patA; aminotransferase [EC:2.6.1.-]
		ko:K01051 E3.1.1.11; pectinesterase [EC:3.1.1.11]
		ko:K01190 lacZ; beta-galactosidase [EC:3.2.1.23]
		ko:K01478 arcA; arginine deiminase [EC:3.5.3.6]
		ko:K01815 kduI; 4-deoxy-L-threo-5-hexosulose-uronate ketol-isomerase [EC:5.3.1.17]
		ko:K01847 MUT; methylmalonyl-CoA mutase [EC:5.4.99.2]
		ko:K04518 pheA2; prephenate dehydratase [EC:4.2.1.51]
		ko:K05602 hisN; histidinol-phosphatase [EC:3.1.3.15]
		ko:K05822 dapH; tetrahydrodipicolinate N-acetyltransferase [EC:2.3.1.89]
		ko:K15226 tyrAa; arogenate dehydrogenase (NADP+) [EC:1.3.1.78]
		ko:K16870 wbbL; N-acetylglucosaminyl-diphospho-decaprenol L-rhamnosyltransferase [EC:2.4.1.289]
		ko:K19003 mgdA; 1,2-diacylglycerol 3-beta-glucosyltransferase [EC:2.4.1.336]
2	map02010 ABC transporters (8)	ko:K05847 opuA; osmoprotectant transport system ATP-binding protein [EC:7.6.2.9]
		ko:K10039 peb1A; aspartate/glutamate/glutamine transport system substrate-binding protein
		ko:K10040 peb1B; aspartate/glutamate/glutamine transport system permease protein
		ko:K17074 lysX2; putative lysine transport system permease protein
		ko:K17244 chiE; putative chitobiose transport system substrate-binding protein
		ko:K17316 gtsB; glucose/mannose transport system permease protein
		ko:K17317 gtsC; glucose/mannose transport system permease protein
		ko:K19084 braE; bacitracin transport system permease protein
3	map01110 Biosynthesis of secondary metabolites (6)	ko:K00841 patA; aminotransferase [EC:2.6.1.-]
		ko:K01478 arcA; arginine deiminase [EC:3.5.3.6]
		ko:K04518 pheA2; prephenate dehydratase [EC:4.2.1.51]
		ko:K05602 hisN; histidinol-phosphatase [EC:3.1.3.15]
		ko:K05822 dapH; tetrahydrodipicolinate N-acetyltransferase [EC:2.3.1.89]
		ko:K15226 tyrAa; arogenate dehydrogenase (NADP+) [EC:1.3.1.78]
4	map02020 Two-component system (6)	ko:K01051 E3.1.1.11; pectinesterase [EC:3.1.1.11]
		ko:K07693 desR; two-component system, NarL family, response regulator DesR
		ko:K07704 lytS; two-component system, LytTR family, sensor histidine kinase LytS [EC:2.7.13.3]
		ko:K07769 nblS; two-component system, OmpR family, sensor histidine kinase NblS [EC:2.7.13.3]
		ko:K11329 rpaB; two-component system, OmpR family, response regulator RpaB
		ko:K19084 braE; bacitracin transport system permease protein
5	map01230 Biosynthesis of amino acids (4)	ko:K00841 patA; aminotransferase [EC:2.6.1.-]
		ko:K04518 pheA2; prephenate dehydratase [EC:4.2.1.51]
		ko:K05602 hisN; histidinol-phosphatase [EC:3.1.3.15]
		ko:K05822 dapH; tetrahydrodipicolinate N-acetyltransferase [EC:2.3.1.89]
6	map00040 Pentose and glucuronate interconversions (2)	ko:K01051 E3.1.1.11; pectinesterase [EC:3.1.1.11]
		ko:K01815 kduI; 4-deoxy-L-threo-5-hexosulose-uronate ketol-isomerase [EC:5.3.1.17]
7	map01120 Microbial metabolism in diverse environments (2)	ko:K00392 sir; sulfite reductase (ferredoxin) [EC:1.8.7.1]
		ko:K01847 MUT; methylmalonyl-CoA mutase [EC:5.4.99.2]
8	map00300 Lysine biosynthesis (2)	ko:K00841 patA; aminotransferase [EC:2.6.1.-]
		ko:K05822 dapH; tetrahydrodipicolinate N-acetyltransferase [EC:2.3.1.89]
9	map00400 Phenylalanine, tyrosine and tryptophan biosynthesis (2)	ko:K04518 pheA2; prephenate dehydratase [EC:4.2.1.51]
		ko:K15226 tyrAa; arogenate dehydrogenase (NADP+) [EC:1.3.1.78]
10	map00572 Arabinogalactan biosynthesis - Mycobacterium (1)	ko:K16870 wbbL; N-acetylglucosaminyl-diphospho-decaprenol L-rhamnosyltransferase [EC:2.4.1.289]
11	map04261 Adrenergic signaling in cardiomyocytes (1)	ko:K04962 RYR2; ryanodine receptor 2
12	map04371 Apelin signaling pathway (1)	ko:K04962 RYR2; ryanodine receptor 2
13	map05022 Pathways of neurodegeneration - multiple diseases (1)	ko:K04962 RYR2; ryanodine receptor 2
14	map04260 Cardiac muscle contraction (1)	ko:K04962 RYR2; ryanodine receptor 2
15	map00280 Valine, leucine and isoleucine degradation (1)	ko:K01847 MUT; methylmalonyl-CoA mutase [EC:5.4.99.2]
16	map04972 Pancreatic secretion (1)	ko:K04962 RYR2; ryanodine receptor 2
17	map00052 Galactose metabolism (1)	ko:K01190 lacZ; beta-galactosidase [EC:3.2.1.23]
18	map04713 Circadian entrainment (1)	ko:K04962 RYR2; ryanodine receptor 2
19	map00920 Sulfur metabolism (1)	ko:K00392 sir; sulfite reductase (ferredoxin) [EC:1.8.7.1]
20	map04921 Oxytocin signaling pathway (1)	ko:K04962 RYR2; ryanodine receptor 2
21	map05410 Hypertrophic cardiomyopathy (1)	ko:K04962 RYR2; ryanodine receptor 2
22	map05414 Dilated cardiomyopathy (1)	ko:K04962 RYR2; ryanodine receptor 2
23	map04024 cAMP signaling pathway (1)	ko:K04962 RYR2; ryanodine receptor 2
24	map00340 Histidine metabolism (1)	ko:K05602 hisN; histidinol-phosphatase [EC:3.1.3.15]
25	map04911 Insulin secretion (1)	ko:K04962 RYR2; ryanodine receptor 2
26	map01200 Carbon metabolism (1)	ko:K01847 MUT; methylmalonyl-CoA mutase [EC:5.4.99.2]
27	map00720 Carbon fixation pathways in prokaryotes (1)	ko:K01847 MUT; methylmalonyl-CoA mutase [EC:5.4.99.2]
28	map00260 Glycine, serine and threonine metabolism (1)	ko:K00639 kbl; glycine C-acetyltransferase [EC:2.3.1.29]
29	map00220 Arginine biosynthesis (1)	ko:K01478 arcA; arginine deiminase [EC:3.5.3.6]
30	map05412 Arrhythmogenic right ventricular cardiomyopathy (1)	ko:K04962 RYR2; ryanodine receptor 2
31	map00630 Glyoxylate and dicarboxylate metabolism (1)	ko:K01847 MUT; methylmalonyl-CoA mutase [EC:5.4.99.2]
32	map01240 Biosynthesis of cofactors (1)	ko:K00486 KMO; kynurenine 3-monooxygenase [EC:1.14.13.9]
33	map05415 Diabetic cardiomyopathy (1)	ko:K04962 RYR2; ryanodine receptor 2
34	map00561 Glycerolipid metabolism (1)	ko:K19003 mgdA; 1,2-diacylglycerol 3-beta-glucosyltransferase [EC:2.4.1.336]
35	map05020 Prion disease (1)	ko:K04962 RYR2; ryanodine receptor 2
36	map00640 Propanoate metabolism (1)	ko:K01847 MUT; methylmalonyl-CoA mutase [EC:5.4.99.2]
37	map00380 Tryptophan metabolism (1)	ko:K00486 KMO; kynurenine 3-monooxygenase [EC:1.14.13.9]
38	map00051 Fructose and mannose metabolism (1)	ko:K03332 fruA; fructan beta-fructosidase [EC:3.2.1.80]
39	map04020 Calcium signaling pathway (1)	ko:K04962 RYR2; ryanodine receptor 2
40	map00511 Other glycan degradation (1)	ko:K01190 lacZ; beta-galactosidase [EC:3.2.1.23]
41	map00600 Sphingolipid metabolism (1)	ko:K01190 lacZ; beta-galactosidase [EC:3.2.1.23]

## Sheet: BRITE
S/N	BRITE ENTRIES	KOs
1	ko01000 Enzymes (34)	ko:K15226 tyrAa; arogenate dehydrogenase (NADP+) [EC:1.3.1.78]
		ko:K00392 sir; sulfite reductase (ferredoxin) [EC:1.8.7.1]
		ko:K00486 KMO; kynurenine 3-monooxygenase [EC:1.14.13.9]
		ko:K12297 rlmL; 23S rRNA (guanine2445-N2)-methyltransferase / 23S rRNA (guanine2069-N7)-methyltransferase [EC:2.1.1.173 2.1.1.264]
		ko:K15984 rsmJ; 16S rRNA (guanine1516-N2)-methyltransferase [EC:2.1.1.242]
		ko:K13252 ptcA; putrescine carbamoyltransferase [EC:2.1.3.6]
		ko:K00639 kbl; glycine C-acetyltransferase [EC:2.3.1.29]
		ko:K07739 ELP3; elongator complex protein 3 [EC:2.3.1.48]
		ko:K05822 dapH; tetrahydrodipicolinate N-acetyltransferase [EC:2.3.1.89]
		ko:K08280 wbbJ; lipopolysaccharide O-acetyltransferase [EC:2.3.1.-]
		ko:K16870 wbbL; N-acetylglucosaminyl-diphospho-decaprenol L-rhamnosyltransferase [EC:2.4.1.289]
		ko:K19003 mgdA; 1,2-diacylglycerol 3-beta-glucosyltransferase [EC:2.4.1.336]
		ko:K13002 wbyL; glycosyltransferase [EC:2.4.1.-]
		ko:K00841 patA; aminotransferase [EC:2.6.1.-]
		ko:K07067 disA; diadenylate cyclase [EC:2.7.7.85]
		ko:K04757 rsbW; serine/threonine-protein kinase RsbW [EC:2.7.11.1]
		ko:K07704 lytS; two-component system, LytTR family, sensor histidine kinase LytS [EC:2.7.13.3]
		ko:K07769 nblS; two-component system, OmpR family, sensor histidine kinase NblS [EC:2.7.13.3]
		ko:K01051 E3.1.1.11; pectinesterase [EC:3.1.1.11]
		ko:K05602 hisN; histidinol-phosphatase [EC:3.1.3.15]
		ko:K01190 lacZ; beta-galactosidase [EC:3.2.1.23]
		ko:K03332 fruA; fructan beta-fructosidase [EC:3.2.1.80]
		ko:K15538 MANEA; glycoprotein endo-alpha-1,2-mannosidase [EC:3.2.1.130]
		ko:K01811 xylS; alpha-D-xyloside xylohydrolase [EC:3.2.1.177]
		ko:K01284 dcp; peptidyl-dipeptidase Dcp [EC:3.4.15.5]
		ko:K01478 arcA; arginine deiminase [EC:3.5.3.6]
		ko:K14440 SMARCAL1; SWI/SNF-related matrix-associated actin-dependent regulator of chromatin subfamily A-like protein 1 [EC:3.6.4.12]
		ko:K04518 pheA2; prephenate dehydratase [EC:4.2.1.51]
		ko:K03534 rhaM; L-rhamnose mutarotase [EC:5.1.3.32]
		ko:K01815 kduI; 4-deoxy-L-threo-5-hexosulose-uronate ketol-isomerase [EC:5.3.1.17]
		ko:K01847 MUT; methylmalonyl-CoA mutase [EC:5.4.99.2]
		ko:K02082 agaS; tagatose-6-phosphate ketose/aldose isomerase [EC:5.-.-.-]
		ko:K17810 asl; D-aspartate ligase [EC:6.3.1.12]
		ko:K05847 opuA; osmoprotectant transport system ATP-binding protein [EC:7.6.2.9]
2	ko02000 Transporters (12)	ko:K05847 opuA; osmoprotectant transport system ATP-binding protein [EC:7.6.2.9]
		ko:K17316 gtsB; glucose/mannose transport system permease protein
		ko:K17317 gtsC; glucose/mannose transport system permease protein
		ko:K17244 chiE; putative chitobiose transport system substrate-binding protein
		ko:K10039 peb1A; aspartate/glutamate/glutamine transport system substrate-binding protein
		ko:K10040 peb1B; aspartate/glutamate/glutamine transport system permease protein
		ko:K17074 lysX2; putative lysine transport system permease protein
		ko:K19084 braE; bacitracin transport system permease protein
		ko:K02429 fucP; MFS transporter, FHS family, L-fucose permease
		ko:K16089 TC.FEV.OM2; outer membrane receptor for ferrienterochelin and colicins
		ko:K03758 arcD; arginine:ornithine antiporter / lysine permease
		ko:K03832 tonB; periplasmic protein TonB
3	ko02022 Two-component system (4)	ko:K07769 nblS; two-component system, OmpR family, sensor histidine kinase NblS [EC:2.7.13.3]
		ko:K11329 rpaB; two-component system, OmpR family, response regulator RpaB
		ko:K07693 desR; two-component system, NarL family, response regulator DesR
		ko:K07704 lytS; two-component system, LytTR family, sensor histidine kinase LytS [EC:2.7.13.3]
4	ko03021 Transcription machinery (3)	ko:K03090 sigB; RNA polymerase sigma-B factor
		ko:K04749 rsbV; anti-sigma B factor antagonist
		ko:K04757 rsbW; serine/threonine-protein kinase RsbW [EC:2.7.11.1]
5	ko02048 Prokaryotic defense system (3)	ko:K19076 cmr2; CRISPR-associated protein Cmr2
		ko:K19141 cmr5; CRISPR-associated protein Cmr5
		ko:K19142 cmr6; CRISPR-associated protein Cmr6
6	ko01001 Protein kinases (3)	ko:K04757 rsbW; serine/threonine-protein kinase RsbW [EC:2.7.11.1]
		ko:K07769 nblS; two-component system, OmpR family, sensor histidine kinase NblS [EC:2.7.13.3]
		ko:K07704 lytS; two-component system, LytTR family, sensor histidine kinase LytS [EC:2.7.13.3]
7	ko03000 Transcription factors (2)	ko:K03492 gmuR; GntR family transcriptional regulator, regulator of glucomannan utilization
		ko:K07722 nikR; CopG family transcriptional regulator, nickel-responsive regulator
8	ko01007 Amino acid related enzymes (2)	ko:K00841 patA; aminotransferase [EC:2.6.1.-]
		ko:K00639 kbl; glycine C-acetyltransferase [EC:2.3.1.29]
9	ko03036 Chromosome and associated proteins (2)	ko:K07739 ELP3; elongator complex protein 3 [EC:2.3.1.48]
		ko:K14440 SMARCAL1; SWI/SNF-related matrix-associated actin-dependent regulator of chromatin subfamily A-like protein 1 [EC:3.6.4.12]
10	ko03009 Ribosome biogenesis (2)	ko:K15984 rsmJ; 16S rRNA (guanine1516-N2)-methyltransferase [EC:2.1.1.242]
		ko:K12297 rlmL; 23S rRNA (guanine2445-N2)-methyltransferase / 23S rRNA (guanine2069-N7)-methyltransferase [EC:2.1.1.173 2.1.1.264]
11	ko01005 Lipopolysaccharide biosynthesis proteins (2)	ko:K08280 wbbJ; lipopolysaccharide O-acetyltransferase [EC:2.3.1.-]
		ko:K13002 wbyL; glycosyltransferase [EC:2.4.1.-]
12	ko01003 Glycosyltransferases (2)	ko:K19003 mgdA; 1,2-diacylglycerol 3-beta-glucosyltransferase [EC:2.4.1.336]
		ko:K16870 wbbL; N-acetylglucosaminyl-diphospho-decaprenol L-rhamnosyltransferase [EC:2.4.1.289]
13	ko04990 Domain-containing proteins not elsewhere classified (1)	ko:K04962 RYR2; ryanodine receptor 2
14	ko04040 Ion channels (1)	ko:K04962 RYR2; ryanodine receptor 2
15	ko03016 Transfer RNA biogenesis (1)	ko:K07739 ELP3; elongator complex protein 3 [EC:2.3.1.48]
16	ko01002 Peptidases and inhibitors (1)	ko:K01284 dcp; peptidyl-dipeptidase Dcp [EC:3.4.15.5]

## Sheet: MODULES
S/N	MODULES	KOs
1	M00525 Lysine biosynthesis, acetyl-DAP pathway, aspartate => lysine (2)	ko:K00841 patA; aminotransferase [EC:2.6.1.-]
		ko:K05822 dapH; tetrahydrodipicolinate N-acetyltransferase [EC:2.3.1.89]
2	M00373 Ethylmalonyl pathway (1)	ko:K01847 MUT; methylmalonyl-CoA mutase [EC:5.4.99.2]
3	M00081 Pectin degradation (1)	ko:K01051 E3.1.1.11; pectinesterase [EC:3.1.1.11]
4	M00024 Phenylalanine biosynthesis, chorismate => phenylpyruvate => phenylalanine (1)	ko:K04518 pheA2; prephenate dehydratase [EC:4.2.1.51]
5	M00176 Assimilatory sulfate reduction, sulfate => H2S (1)	ko:K00392 sir; sulfite reductase (ferredoxin) [EC:1.8.7.1]
6	M00038 Tryptophan metabolism, tryptophan => kynurenine => 2-aminomuconate (1)	ko:K00486 KMO; kynurenine 3-monooxygenase [EC:1.14.13.9]
7	M00912 NAD biosynthesis, tryptophan => quinolinate => NAD (1)	ko:K00486 KMO; kynurenine 3-monooxygenase [EC:1.14.13.9]
8	M00026 Histidine biosynthesis, PRPP => histidine (1)	ko:K05602 hisN; histidinol-phosphatase [EC:3.1.3.15]
9	M00741 Propanoyl-CoA metabolism, propanoyl-CoA => succinyl-CoA (1)	ko:K01847 MUT; methylmalonyl-CoA mutase [EC:5.4.99.2]
10	M00376 3-Hydroxypropionate bi-cycle (1)	ko:K01847 MUT; methylmalonyl-CoA mutase [EC:5.4.99.2]

## Sheet: RAW_DATA_KOs
S/N	KOs	baseMean	log2FoldChange	lfcSE	stat	pvalue	padj	Descriptions
1	K03090	5497.45	-2.31712	0.362771	-6.38728	1.10069e-07	0.000103132	K03090 sigB; RNA polymerase sigma-B factor
2	K07067	6004.83	-2.45633	0.379084	-6.47965	8.10575e-08	0.000103132	K07067 disA; diadenylate cyclase [EC:2.7.7.85]
3	K07704	5199.95	-1.88439	0.291168	-6.47182	8.31882e-08	0.000103132	K07704 lytS; two-component system, LytTR family, sensor histidine kinase LytS [EC:2.7.13.3]
4	K08981	535.692	-2.73489	0.411984	-6.63834	4.79436e-08	0.000103132	K08981 K08981; putative membrane protein
5	K19076	9.92597	4.0347	0.632283	6.38116	1.12323e-07	0.000103132	K19076 cmr2, cas10; CRISPR-associated protein Cmr2
6	K19141	9.92597	4.0347	0.632283	6.38116	1.12323e-07	0.000103132	K19141 cmr5; CRISPR-associated protein Cmr5
7	K00392	236.491	-5.31129	0.846234	-6.27638	1.58944e-07	0.000118362	K00392 sir; sulfite reductase (ferredoxin) [EC:1.8.7.1]
8	K19084	9.8973	3.84491	0.614913	6.25277	1.71881e-07	0.000118362	K19084 braE, bceB; bacitracin transport system permease protein
9	K14440	245.911	5.39422	0.8887	6.06979	3.15206e-07	0.000192941	K14440 SMARCAL1, HARP; SWI/SNF-related matrix-associated actin-dependent regulator of chromatin subfamily A-like protein 1 [EC:3.6.4.12]
10	K04757	6246.76	-2.13789	0.354637	-6.02841	3.61527e-07	0.000199165	K04757 rsbW; serine/threonine-protein kinase RsbW [EC:2.7.11.1]
11	K01478	7266.41	-1.82196	0.303817	-5.9969	4.01303e-07	0.00020098	K01478 arcA; arginine deiminase [EC:3.5.3.6]
12	K02082	6789.25	-1.74373	0.298576	-5.84017	6.7427e-07	0.000285735	K02082 agaS; tagatose-6-phosphate ketose/aldose isomerase [EC:5.-.-.-]
13	K10039	5293.45	-1.7155	0.292752	-5.85992	6.316e-07	0.000285735	K10039 peb1A, glnH; aspartate/glutamate/glutamine transport system substrate-binding protein
14	K07693	262.39	-4.32122	0.743366	-5.81304	7.37598e-07	0.000290245	K07693 desR; two-component system, NarL family, response regulator DesR
15	K01190	62359.8	1.31842	0.229554	5.74339	9.28612e-07	0.000326839	K01190 lacZ; beta-galactosidase [EC:3.2.1.23]
16	K01811	15602.8	1.39097	0.242467	5.73674	9.4925e-07	0.000326839	K01811 xylS, yicI; alpha-D-xyloside xylohydrolase [EC:3.2.1.177]
17	K01051	5663.44	2.19615	0.398799	5.50691	2.02648e-06	0.000396021	K01051 E3.1.1.11; pectinesterase [EC:3.1.1.11]
18	K01847	15861.4	1.73728	0.313811	5.53607	1.84086e-06	0.000396021	K01847 MUT; methylmalonyl-CoA mutase [EC:5.4.99.2]
19	K02429	13872.6	1.79519	0.320132	5.60766	1.45382e-06	0.000396021	K02429 fucP; MFS transporter, FHS family, L-fucose permease
20	K05792	229.03	5.61284	1.00608	5.5789	1.59848e-06	0.000396021	K05792 terA; tellurite resistance protein TerA
21	K07722	5927.33	-1.71119	0.307851	-5.5585	1.70968e-06	0.000396021	K07722 nikR; CopG family transcriptional regulator, nickel-responsive regulator
22	K07769	4.68985	3.27239	0.596279	5.48801	2.15658e-06	0.000396021	K07769 nblS; two-component system, OmpR family, sensor histidine kinase NblS [EC:2.7.13.3]
23	K10040	8758.35	-1.98516	0.357919	-5.54638	1.77938e-06	0.000396021	K10040 peb1B, glnP, glnM; aspartate/glutamate/glutamine transport system permease protein
24	K11329	4.68985	3.27239	0.596279	5.48801	2.15658e-06	0.000396021	K11329 rpaB; two-component system, OmpR family, response regulator RpaB
25	K13665	7.75498	3.30341	0.596588	5.53716	1.83427e-06	0.000396021	K13665 gumL; pyruvyltransferase
26	K15226	4.68985	3.27239	0.596279	5.48801	2.15658e-06	0.000396021	K15226 tyrAa; arogenate dehydrogenase (NADP+) [EC:1.3.1.78]
27	K15984	6914.27	-1.56258	0.277368	-5.63361	1.33453e-06	0.000396021	K15984 rsmJ; 16S rRNA (guanine1516-N2)-methyltransferase [EC:2.1.1.242]
28	K16089	17995.1	1.52746	0.270343	5.65008	1.26391e-06	0.000396021	K16089 TC.FEV.OM2, cirA, cfrA, hmuR; outer membrane receptor for ferrienterochelin and colicins
29	K17244	4.68985	3.27239	0.596279	5.48801	2.15658e-06	0.000396021	K17244 chiE; putative chitobiose transport system substrate-binding protein
30	K19003	4.68985	3.27239	0.596279	5.48801	2.15658e-06	0.000396021	K19003 mgdA; 1,2-diacylglycerol 3-beta-glucosyltransferase [EC:2.4.1.336]
31	K01815	6269.47	1.49006	0.275052	5.41736	2.72085e-06	0.000468411	K01815 kduI; 4-deoxy-L-threo-5-hexosulose-uronate ketol-isomerase [EC:5.3.1.17]
32	K03758	4201.76	-2.28941	0.422395	-5.42006	2.69681e-06	0.000468411	K03758 arcD, lysl, lysP; arginine:ornithine antiporter / lysine permease
33	K03317	3328.56	-2.21044	0.41146	-5.3722	3.15606e-06	0.00052687	K03317 TC.CNT; concentrative nucleoside transporter, CNT family
34	K12297	5431.87	-1.91337	0.357701	-5.34908	3.4049e-06	0.000551694	K12297 rlmL, rlmK; 23S rRNA (guanine2445-N2)-methyltransferase / 23S rRNA (guanine2069-N7)-methyltransferase [EC:2.1.1.173 2.1.1.264]
35	K09138	366.055	-2.53977	0.476347	-5.33177	3.60393e-06	0.000567258	K09138 K09138; uncharacterized protein
36	K03534	6429.11	1.61404	0.304559	5.2996	4.00483e-06	0.000612598	K03534 rhaM; L-rhamnose mutarotase [EC:5.1.3.32]
37	K17074	10155.9	-1.6034	0.303021	-5.29137	4.11438e-06	0.000612598	K17074 lysX2; putative lysine transport system permease protein
38	K07739	4176.98	-2.40169	0.460941	-5.21041	5.36289e-06	0.000777478	K07739 ELP3, KAT9; elongator complex protein 3 [EC:2.3.1.48]
39	K00639	11100.4	1.39987	0.270921	5.16706	6.17903e-06	0.000823281	K00639 kbl, GCAT; glycine C-acetyltransferase [EC:2.3.1.29]
40	K04962	22.2679	3.39074	0.657261	5.15889	6.34603e-06	0.000823281	K04962 RYR2; ryanodine receptor 2
41	K05822	4696.15	-1.85066	0.358265	-5.16562	6.20802e-06	0.000823281	K05822 dapH, dapD; tetrahydrodipicolinate N-acetyltransferase [EC:2.3.1.89]
42	K15538	24.8365	3.56973	0.692472	5.15505	6.42604e-06	0.000823281	K15538 MANEA; glycoprotein endo-alpha-1,2-mannosidase [EC:3.2.1.130]
43	K17316	17.1889	-3.70853	0.719165	-5.15672	6.39112e-06	0.000823281	K17316 gtsB, glcF; glucose/mannose transport system permease protein
44	K17317	16.9879	-3.68763	0.717532	-5.13932	6.76445e-06	0.000846939	K17317 gtsC, glcG; glucose/mannose transport system permease protein
45	K00486	2.30559	2.573	0.503348	5.11177	7.40052e-06	0.000896291	K00486 KMO; kynurenine 3-monooxygenase [EC:1.14.13.9]
46	K06994	231.438	-3.58722	0.702231	-5.10832	7.48401e-06	0.000896291	K06994 K06994; putative drug exporter of the RND superfamily
47	K05847	8330.46	-1.31409	0.257752	-5.09827	7.73331e-06	0.000897354	K05847 opuA; osmoprotectant transport system ATP-binding protein [EC:7.6.2.9]
48	K06338	18.3799	3.7041	0.727021	5.0949	7.81866e-06	0.000897354	K06338 cotSA; spore coat protein SA
49	K08280	18.3325	3.69773	0.726844	5.08737	8.01273e-06	0.00090086	K08280 wbbJ; lipopolysaccharide O-acetyltransferase [EC:2.3.1.-]
50	K03832	14503.7	1.44177	0.283791	5.0804	8.19667e-06	0.000903109	K03832 tonB; periplasmic protein TonB
51	K19142	5.94813	3.17776	0.629157	5.05082	9.02491e-06	0.000974867	K19142 cmr6; CRISPR-associated protein Cmr6
52	K00841	4397.71	-1.80708	0.359853	-5.02173	9.9201e-06	0.00101203	K00841 patA; aminotransferase [EC:2.6.1.-]
53	K03307	37609.7	1.01213	0.201181	5.03095	9.62744e-06	0.00101203	K03307 TC.SSS; solute:Na+ symporter, SSS family
54	K16870	27.8788	-3.39526	0.675502	-5.02628	9.77455e-06	0.00101203	K16870 wbbL; N-acetylglucosaminyl-diphospho-decaprenol L-rhamnosyltransferase [EC:2.4.1.289]
55	K01284	7304.46	1.76519	0.352289	5.01063	1.02846e-05	0.00103014	K01284 dcp; peptidyl-dipeptidase Dcp [EC:3.4.15.5]
56	K03492	5642.8	-2.14129	0.430193	-4.97751	1.14515e-05	0.00112654	K03492 ydhQ; GntR family transcriptional regulator
57	K05602	54.6455	-3.30723	0.665919	-4.96641	1.18713e-05	0.00114735	K05602 hisN; histidinol-phosphatase [EC:3.1.3.15]
58	K06922	19.5298	3.51911	0.711239	4.94786	1.26071e-05	0.00119187	K06922 K06922; uncharacterized protein
59	K13002	1228.82	3.58721	0.725565	4.94403	1.27646e-05	0.00119187	K13002 wbyL; glycosyltransferase [EC:2.4.1.-]
60	K09939	1318.57	3.02805	0.614628	4.92665	1.35038e-05	0.00123987	K09939 K09939; uncharacterized protein
61	K13252	3572.3	-2.25331	0.458992	-4.90925	1.42856e-05	0.00129015	K13252 ptcA; putrescine carbamoyltransferase [EC:2.1.3.6]
62	K05791	230.682	4.86889	0.993972	4.89842	1.47951e-05	0.00131461	K05791 terZ; tellurium resistance protein TerZ
63	K04518	4747.73	1.57548	0.322237	4.88919	1.52433e-05	0.00133294	K04518 pheA2; prephenate dehydratase [EC:4.2.1.51]
64	K03332	2552.21	2.01903	0.414392	4.87228	1.60994e-05	0.00137065	K03332 fruA; fructan beta-fructosidase [EC:3.2.1.80]
65	K17810	10480.8	-1.58606	0.32562	-4.87088	1.61721e-05	0.00137065	K17810 asl; D-aspartate ligase [EC:6.3.1.12]
66	K04749	8962.62	-1.38339	0.28545	-4.84637	1.75039e-05	0.00146104	K04749 rsbV; anti-sigma B factor antagonist

## Sheet: NOTES
Notes:
1. Data shown = Pre-Op/Healthy (i.e Heathy is the denominator)
2. Data include all differentially abundant KOs (alpha < 0.05, adjusted P value =/< 0.001)
