# Supplementary material for: Alterations in co-abundant bacteriome in colorectal cancer and its persistence after surgery: a pilot study
Source: Sci Rep. 2022 Jun 14;12:9829. doi: 10.1038/s41598-022-14203-z (PMC9198081; doi:10.1038/s41598-022-14203-z)
Supplement: Supplementary file 6 — Supplementary Information 4. [file 41598_2022_14203_MOESM6_ESM.xlsx]

## Sheet: PATHWAYS
S/N	PATHWAYS	KOs
1	map01100 Metabolic pathways (101)	ko:K00023 phbB; acetoacetyl-CoA reductase [EC:1.1.1.36]
		ko:K00102 LDHD; D-lactate dehydrogenase (cytochrome) [EC:1.1.2.4]
		ko:K00220 tyrC; cyclohexadieny/prephenate dehydrogenase [EC:1.3.1.43 1.3.1.12]
		ko:K00244 frdA; fumarate reductase flavoprotein subunit [EC:1.3.5.4]
		ko:K00392 sir; sulfite reductase (ferredoxin) [EC:1.8.7.1]
		ko:K00404 ccoN; cytochrome c oxidase cbb3-type subunit I [EC:7.1.1.9]
		ko:K00405 ccoO; cytochrome c oxidase cbb3-type subunit II
		ko:K00407 ccoQ; cytochrome c oxidase cbb3-type subunit IV
		ko:K00411 UQCRFS1; ubiquinol-cytochrome c reductase iron-sulfur subunit [EC:7.1.1.8]
		ko:K00412 CYTB; ubiquinol-cytochrome c reductase cytochrome b subunit
		ko:K00413 CYC1; ubiquinol-cytochrome c reductase cytochrome c1 subunit
		ko:K00459 ncd2; nitronate monooxygenase [EC:1.13.12.16]
		ko:K00510 HMOX1; heme oxygenase 1 [EC:1.14.14.18]
		ko:K00613 GATM; glycine amidinotransferase [EC:2.1.4.1]
		ko:K00639 kbl; glycine C-acetyltransferase [EC:2.3.1.29]
		ko:K00643 E2.3.1.37; 5-aminolevulinate synthase [EC:2.3.1.37]
		ko:K00901 dgkA; diacylglycerol kinase (ATP) [EC:2.7.1.107]
		ko:K00955 cysNC; bifunctional enzyme CysN/CysC [EC:2.7.7.4 2.7.1.25]
		ko:K00957 cysD; sulfate adenylyltransferase subunit 2 [EC:2.7.7.4]
		ko:K00958 sat; sulfate adenylyltransferase [EC:2.7.7.4]
		ko:K00992 murU; N-acetyl-alpha-D-muramate 1-phosphate uridylyltransferase [EC:2.7.7.99]
		ko:K01042 selA; L-seryl-tRNA(Ser) seleniumtransferase [EC:2.9.1.1]
		ko:K01120 cpdP; 3',5'-cyclic-nucleotide phosphodiesterase [EC:3.1.4.17]
		ko:K01236 treZ; maltooligosyltrehalose trehalohydrolase [EC:3.2.1.141]
		ko:K01478 arcA; arginine deiminase [EC:3.5.3.6]
		ko:K01569 oxdD; oxalate decarboxylase [EC:4.1.1.2]
		ko:K01574 adc; acetoacetate decarboxylase [EC:4.1.1.4]
		ko:K01578 MLYCD; malonyl-CoA decarboxylase [EC:4.1.1.9]
		ko:K01579 panD; aspartate 1-decarboxylase [EC:4.1.1.11]
		ko:K01615 gcdA; glutaconyl-CoA decarboxylase subunit alpha [EC:7.2.4.5]
		ko:K01724 PCBD; 4a-hydroxytetrahydrobiopterin dehydratase [EC:4.2.1.96]
		ko:K01768 E4.6.1.1; adenylate cyclase [EC:4.6.1.1]
		ko:K01818 fucI; L-fucose/D-arabinose isomerase [EC:5.3.1.25 5.3.1.3]
		ko:K01847 MUT; methylmalonyl-CoA mutase [EC:5.4.99.2]
		ko:K01907 AACS; acetoacetyl-CoA synthetase [EC:6.2.1.16]
		ko:K01962 accA; acetyl-CoA carboxylase carboxyl transferase subunit alpha [EC:6.4.1.2 2.1.3.15]
		ko:K01965 PCCA; propionyl-CoA carboxylase alpha chain [EC:6.4.1.3]
		ko:K01969 E6.4.1.4B; 3-methylcrotonyl-CoA carboxylase beta subunit [EC:6.4.1.4]
		ko:K02230 cobN; cobaltochelatase CobN [EC:6.6.1.2]
		ko:K02258 COX11; cytochrome c oxidase assembly protein subunit 11
		ko:K02259 COX15; heme a synthase [EC:1.17.99.9]
		ko:K02274 coxA; cytochrome c oxidase subunit I [EC:7.1.1.9]
		ko:K02275 coxB; cytochrome c oxidase subunit II [EC:7.1.1.9]
		ko:K02276 coxC; cytochrome c oxidase subunit III [EC:7.1.1.9]
		ko:K02745 agaV; N-acetylgalactosamine PTS system EIIB component [EC:2.7.1.-]
		ko:K02746 agaW; N-acetylgalactosamine PTS system EIIC component
		ko:K02747 agaE; N-acetylgalactosamine PTS system EIID component
		ko:K02796 manZ; mannose PTS system EIID component
		ko:K02805 wecE; dTDP-4-amino-4,6-dideoxygalactose transaminase [EC:2.6.1.59]
		ko:K03404 chlD; magnesium chelatase subunit D [EC:6.6.1.1]
		ko:K03405 chlI; magnesium chelatase subunit I [EC:6.6.1.1]
		ko:K03821 phbC; polyhydroxyalkanoate synthase subunit PhaC [EC:2.3.1.-]
		ko:K03852 xsc; sulfoacetaldehyde acetyltransferase [EC:2.3.3.15]
		ko:K04093 pheA1; chorismate mutase [EC:5.4.99.5]
		ko:K05352 tarJ; ribitol-5-phosphate 2-dehydrogenase (NADP+) [EC:1.1.1.405]
		ko:K05375 mbtH; MbtH protein
		ko:K05602 hisN; histidinol-phosphatase [EC:3.1.3.15]
		ko:K05603 hutF; formimidoylglutamate deiminase [EC:3.5.3.13]
		ko:K05822 dapH; tetrahydrodipicolinate N-acetyltransferase [EC:2.3.1.89]
		ko:K05873 cyaB; adenylate cyclase, class 2 [EC:4.6.1.1]
		ko:K05973 phaZ; poly(3-hydroxybutyrate) depolymerase [EC:3.1.1.75]
		ko:K06446 DCAA; acyl-CoA dehydrogenase [EC:1.3.99.-]
		ko:K07151 STT3; dolichyl-diphosphooligosaccharide---protein glycosyltransferase [EC:2.4.99.18]
		ko:K07160 pxpA; 5-oxoprolinase (ATP-hydrolysing) subunit A [EC:3.5.2.9]
		ko:K07306 dmsA; anaerobic dimethyl sulfoxide reductase subunit A [EC:1.8.5.3]
		ko:K07307 dmsB; anaerobic dimethyl sulfoxide reductase subunit B
		ko:K07812 torZ; trimethylamine-N-oxide reductase (cytochrome c) [EC:1.7.2.3]
		ko:K08094 hxlB; 6-phospho-3-hexuloisomerase [EC:5.3.1.27]
		ko:K08097 comA; phosphosulfolactate synthase [EC:4.4.1.19]
		ko:K08352 phsA; thiosulfate reductase / polysulfide reductase chain A [EC:1.8.5.5]
		ko:K08965 mtnW; 2,3-diketo-5-methylthiopentyl-1-phosphate enolase [EC:5.3.2.5]
		ko:K08973 hemJ; protoporphyrinogen IX oxidase [EC:1.3.99.-]
		ko:K09711 lipS1; lipoyl synthase
		ko:K09883 cobT; cobaltochelatase CobT [EC:6.6.1.2]
		ko:K10353 E2.7.1.76; deoxyadenosine kinase [EC:2.7.1.76]
		ko:K10764 metZ; O-succinylhomoserine sulfhydrylase [EC:2.5.1.-]
		ko:K11177 yagR; xanthine dehydrogenase YagR molybdenum-binding subunit [EC:1.17.1.4]
		ko:K11178 yagS; xanthine dehydrogenase YagS FAD-binding subunit [EC:1.17.1.4]
		ko:K11532 glpX-SEBP; fructose-1,6-bisphosphatase II / sedoheptulose-1,7-bisphosphatase [EC:3.1.3.11 3.1.3.37]
		ko:K13057 treT; trehalose synthase [EC:2.4.1.245]
		ko:K13061 rhlI; acyl homoserine lactone synthase [EC:2.3.1.184]
		ko:K13483 yagT; xanthine dehydrogenase YagT iron-sulfur-binding subunit
		ko:K15022 fdhB; formate dehydrogenase (NADP+) beta subunit [EC:1.17.1.10]
		ko:K15371 GDH2; glutamate dehydrogenase [EC:1.4.1.2]
		ko:K15519 dck; deoxyadenosine/deoxycytidine kinase [EC:2.7.1.76 2.7.1.74]
		ko:K15921 xynD; arabinoxylan arabinofuranohydrolase [EC:3.2.1.55]
		ko:K16146 pep2; maltokinase [EC:2.7.1.175]
		ko:K16149 1,4-alpha-glucan branching enzyme [EC:2.4.1.18]
		ko:K16165 nagK; fumarylpyruvate hydrolase [EC:3.7.1.20]
		ko:K16306 fructose-bisphosphate aldolase / 2-amino-3
		ko:K16422 hmo; 4-hydroxymandelate oxidase [EC:1.1.3.46]
		ko:K16870 wbbL; N-acetylglucosaminyl-diphospho-decaprenol L-rhamnosyltransferase [EC:2.4.1.289]
		ko:K17228 sfnG; dimethylsulfone monooxygenase [EC:1.14.14.35]
		ko:K17835 griH; 3-amino-4-hydroxybenzoic acid synthase [EC:4.1.99.20]
		ko:K17989 SDS; L-serine/L-threonine ammonia-lyase [EC:4.3.1.17 4.3.1.19]
		ko:K18118 aarC; succinyl-CoA:acetate CoA-transferase [EC:2.8.3.18]
		ko:K18589 dfrA1; dihydrofolate reductase (trimethoprim resistance protein) [EC:1.5.1.3]
		ko:K18661 matB; malonyl-CoA/methylmalonyl-CoA synthetase [EC:6.2.1.-]
		ko:K18824 sul2; dihydropteroate synthase type 2 [EC:2.5.1.15]
		ko:K19548 bacC; dihydroanticapsin dehydrogenase [EC:1.1.1.385]
		ko:K19746 dauA; D-arginine dehydrogenase [EC:1.4.99.6]
2	map01110 Biosynthesis of secondary metabolites (30)	ko:K00220 tyrC; cyclohexadieny/prephenate dehydrogenase [EC:1.3.1.43 1.3.1.12]
		ko:K00244 frdA; fumarate reductase flavoprotein subunit [EC:1.3.5.4]
		ko:K00510 HMOX1; heme oxygenase 1 [EC:1.14.14.18]
		ko:K00643 E2.3.1.37; 5-aminolevulinate synthase [EC:2.3.1.37]
		ko:K00901 dgkA; diacylglycerol kinase (ATP) [EC:2.7.1.107]
		ko:K00955 cysNC; bifunctional enzyme CysN/CysC [EC:2.7.7.4 2.7.1.25]
		ko:K00957 cysD; sulfate adenylyltransferase subunit 2 [EC:2.7.7.4]
		ko:K00958 sat; sulfate adenylyltransferase [EC:2.7.7.4]
		ko:K01236 treZ; maltooligosyltrehalose trehalohydrolase [EC:3.2.1.141]
		ko:K01478 arcA; arginine deiminase [EC:3.5.3.6]
		ko:K01579 panD; aspartate 1-decarboxylase [EC:4.1.1.11]
		ko:K01962 accA; acetyl-CoA carboxylase carboxyl transferase subunit alpha [EC:6.4.1.2 2.1.3.15]
		ko:K01965 PCCA; propionyl-CoA carboxylase alpha chain [EC:6.4.1.3]
		ko:K02259 COX15; heme a synthase [EC:1.17.99.9]
		ko:K03404 chlD; magnesium chelatase subunit D [EC:6.6.1.1]
		ko:K03405 chlI; magnesium chelatase subunit I [EC:6.6.1.1]
		ko:K04093 pheA1; chorismate mutase [EC:5.4.99.5]
		ko:K05375 mbtH; MbtH protein
		ko:K05602 hisN; histidinol-phosphatase [EC:3.1.3.15]
		ko:K05822 dapH; tetrahydrodipicolinate N-acetyltransferase [EC:2.3.1.89]
		ko:K08973 hemJ; protoporphyrinogen IX oxidase [EC:1.3.99.-]
		ko:K11532 glpX-SEBP; fructose-1,6-bisphosphatase II / sedoheptulose-1,7-bisphosphatase [EC:3.1.3.11 3.1.3.37]
		ko:K16016 rifK; 3-amino-5-hydroxybenzoate synthase [EC:4.2.1.144 2.6.1.-]
		ko:K16149 1
		ko:K16306 fructose-bisphosphate aldolase / 2-amino-3
		ko:K16422 hmo; 4-hydroxymandelate oxidase [EC:1.1.3.46]
		ko:K17835 griH; 3-amino-4-hydroxybenzoic acid synthase [EC:4.1.99.20]
		ko:K17989 SDS; L-serine/L-threonine ammonia-lyase [EC:4.3.1.17 4.3.1.19]
		ko:K18118 aarC; succinyl-CoA:acetate CoA-transferase [EC:2.8.3.18]
		ko:K19548 bacC; dihydroanticapsin dehydrogenase [EC:1.1.1.385]
3	map01120 Microbial metabolism in diverse environments (25)	ko:K00023 phbB; acetoacetyl-CoA reductase [EC:1.1.1.36]
		ko:K00244 frdA; fumarate reductase flavoprotein subunit [EC:1.3.5.4]
		ko:K00392 sir; sulfite reductase (ferredoxin) [EC:1.8.7.1]
		ko:K00955 cysNC; bifunctional enzyme CysN/CysC [EC:2.7.7.4 2.7.1.25]
		ko:K00957 cysD; sulfate adenylyltransferase subunit 2 [EC:2.7.7.4]
		ko:K00958 sat; sulfate adenylyltransferase [EC:2.7.7.4]
		ko:K01615 gcdA; glutaconyl-CoA decarboxylase subunit alpha [EC:7.2.4.5]
		ko:K01818 fucI; L-fucose/D-arabinose isomerase [EC:5.3.1.25 5.3.1.3]
		ko:K01847 MUT; methylmalonyl-CoA mutase [EC:5.4.99.2]
		ko:K01962 accA; acetyl-CoA carboxylase carboxyl transferase subunit alpha [EC:6.4.1.2 2.1.3.15]
		ko:K01965 PCCA; propionyl-CoA carboxylase alpha chain [EC:6.4.1.3]
		ko:K06446 DCAA; acyl-CoA dehydrogenase [EC:1.3.99.-]
		ko:K07812 torZ; trimethylamine-N-oxide reductase (cytochrome c) [EC:1.7.2.3]
		ko:K08094 hxlB; 6-phospho-3-hexuloisomerase [EC:5.3.1.27]
		ko:K08097 comA; phosphosulfolactate synthase [EC:4.4.1.19]
		ko:K08352 phsA; thiosulfate reductase / polysulfide reductase chain A [EC:1.8.5.5]
		ko:K11177 yagR; xanthine dehydrogenase YagR molybdenum-binding subunit [EC:1.17.1.4]
		ko:K11178 yagS; xanthine dehydrogenase YagS FAD-binding subunit [EC:1.17.1.4]
		ko:K11532 glpX-SEBP; fructose-1,6-bisphosphatase II / sedoheptulose-1,7-bisphosphatase [EC:3.1.3.11 3.1.3.37]
		ko:K13483 yagT; xanthine dehydrogenase YagT iron-sulfur-binding subunit
		ko:K15022 fdhB; formate dehydrogenase (NADP+) beta subunit [EC:1.17.1.10]
		ko:K15371 GDH2; glutamate dehydrogenase [EC:1.4.1.2]
		ko:K16165 nagK; fumarylpyruvate hydrolase [EC:3.7.1.20]
		ko:K16306 fructose-bisphosphate aldolase / 2-amino-3
		ko:K18118 aarC; succinyl-CoA:acetate CoA-transferase [EC:2.8.3.18]
4	map02010 ABC transporters (22)	ko:K05660 ABCB5; ATP-binding cassette, subfamily B (MDR/TAP), member 5
		ko:K09688 kpsM; capsular polysaccharide transport system permease protein
		ko:K09689 kpsT; capsular polysaccharide transport system ATP-binding protein [EC:7.6.2.12]
		ko:K10039 peb1A; aspartate/glutamate/glutamine transport system substrate-binding protein
		ko:K10040 peb1B; aspartate/glutamate/glutamine transport system permease protein
		ko:K10041 peb1C; aspartate/glutamate/glutamine transport system ATP-binding protein [EC:7.4.2.1]
		ko:K10107 kpsE; capsular polysaccharide transport system permease protein
		ko:K10188 lacE; lactose/L-arabinose transport system substrate-binding protein
		ko:K10189 lacF; lactose/L-arabinose transport system permease protein
		ko:K10190 lacG; lactose/L-arabinose transport system permease protein
		ko:K11004 hlyB; ATP-binding cassette, subfamily B, bacterial HlyB/CyaB
		ko:K16905 fluoroquinolone transport system permease protein
		ko:K16906 fluoroquinolone transport system permease protein
		ko:K16907 fluoroquinolone transport system ATP-binding protein [EC:7.6.2.-]
		ko:K17073 lysX1; putative lysine transport system substrate-binding protein
		ko:K17074 lysX2; putative lysine transport system permease protein
		ko:K17076 lysY; putative lysine transport system ATP-binding protein
		ko:K17316 gtsB; glucose/mannose transport system permease protein
		ko:K17317 gtsC; glucose/mannose transport system permease protein
		ko:K17324 glpS; glycerol transport system ATP-binding protein
		ko:K17325 glpT; glycerol transport system ATP-binding protein
		ko:K17330 dasB; N,N'-diacetylchitobiose transport system permease protein
5	map02020 Two-component system (22)	ko:K00244 frdA; fumarate reductase flavoprotein subunit [EC:1.3.5.4]
		ko:K00404 ccoN; cytochrome c oxidase cbb3-type subunit I [EC:7.1.1.9]
		ko:K00405 ccoO; cytochrome c oxidase cbb3-type subunit II
		ko:K00407 ccoQ; cytochrome c oxidase cbb3-type subunit IV
		ko:K00411 UQCRFS1; ubiquinol-cytochrome c reductase iron-sulfur subunit [EC:7.1.1.8]
		ko:K00412 CYTB; ubiquinol-cytochrome c reductase cytochrome b subunit
		ko:K00413 CYC1; ubiquinol-cytochrome c reductase cytochrome c1 subunit
		ko:K01643 citF; citrate lyase subunit alpha / citrate CoA-transferase [EC:2.8.3.10]
		ko:K01644 citE; citrate lyase subunit beta / citryl-CoA lyase [EC:4.1.3.34]
		ko:K01646 citD; citrate lyase subunit gamma (acyl carrier protein)
		ko:K02259 COX15; heme a synthase [EC:1.17.99.9]
		ko:K07684 narL; two-component system, NarL family, nitrate/nitrite response regulator NarL
		ko:K07704 lytS; two-component system, LytTR family, sensor histidine kinase LytS [EC:2.7.13.3]
		ko:K07717 ycbA; two-component system, sensor histidine kinase YcbA [EC:2.7.13.3]
		ko:K08641 vanX; zinc D-Ala-D-Ala dipeptidase [EC:3.4.13.22]
		ko:K10851 nreA; nitrogen regulatory protein A
		ko:K11712 dctR; two-component system, LuxR family, response regulator DctR
		ko:K13041 ttrR; two-component system, LuxR family, response regulator TtrR
		ko:K13061 rhlI; acyl homoserine lactone synthase [EC:2.3.1.184]
		ko:K13927 citXG; holo-ACP synthase / triphosphoribosyl-dephospho-CoA synthase [EC:2.7.7.61 2.4.2.52]
		ko:K15011 regB; two-component system, sensor histidine kinase RegB [EC:2.7.13.3]
		ko:K15012 regA; two-component system, response regulator RegA
6	map00230 Purine metabolism (12)	ko:K00955 cysNC; bifunctional enzyme CysN/CysC [EC:2.7.7.4 2.7.1.25]
		ko:K00957 cysD; sulfate adenylyltransferase subunit 2 [EC:2.7.7.4]
		ko:K00958 sat; sulfate adenylyltransferase [EC:2.7.7.4]
		ko:K01120 cpdP; 3',5'-cyclic-nucleotide phosphodiesterase [EC:3.1.4.17]
		ko:K01768 E4.6.1.1; adenylate cyclase [EC:4.6.1.1]
		ko:K05873 cyaB; adenylate cyclase, class 2 [EC:4.6.1.1]
		ko:K10353 E2.7.1.76; deoxyadenosine kinase [EC:2.7.1.76]
		ko:K11177 yagR; xanthine dehydrogenase YagR molybdenum-binding subunit [EC:1.17.1.4]
		ko:K11178 yagS; xanthine dehydrogenase YagS FAD-binding subunit [EC:1.17.1.4]
		ko:K13483 yagT; xanthine dehydrogenase YagT iron-sulfur-binding subunit
		ko:K15518 dgk; deoxyguanosine kinase [EC:2.7.1.113]
		ko:K15519 dck; deoxyadenosine/deoxycytidine kinase [EC:2.7.1.76 2.7.1.74]
7	map00190 Oxidative phosphorylation (12)	ko:K00244 frdA; fumarate reductase flavoprotein subunit [EC:1.3.5.4]
		ko:K00404 ccoN; cytochrome c oxidase cbb3-type subunit I [EC:7.1.1.9]
		ko:K00405 ccoO; cytochrome c oxidase cbb3-type subunit II
		ko:K00407 ccoQ; cytochrome c oxidase cbb3-type subunit IV
		ko:K00411 UQCRFS1; ubiquinol-cytochrome c reductase iron-sulfur subunit [EC:7.1.1.8]
		ko:K00412 CYTB; ubiquinol-cytochrome c reductase cytochrome b subunit
		ko:K00413 CYC1; ubiquinol-cytochrome c reductase cytochrome c1 subunit
		ko:K02258 COX11; cytochrome c oxidase assembly protein subunit 11
		ko:K02259 COX15; heme a synthase [EC:1.17.99.9]
		ko:K02274 coxA; cytochrome c oxidase subunit I [EC:7.1.1.9]
		ko:K02275 coxB; cytochrome c oxidase subunit II [EC:7.1.1.9]
		ko:K02276 coxC; cytochrome c oxidase subunit III [EC:7.1.1.9]
8	map01200 Carbon metabolism (11)	ko:K00023 phbB; acetoacetyl-CoA reductase [EC:1.1.1.36]
		ko:K00244 frdA; fumarate reductase flavoprotein subunit [EC:1.3.5.4]
		ko:K01847 MUT; methylmalonyl-CoA mutase [EC:5.4.99.2]
		ko:K01962 accA; acetyl-CoA carboxylase carboxyl transferase subunit alpha [EC:6.4.1.2 2.1.3.15]
		ko:K01965 PCCA; propionyl-CoA carboxylase alpha chain [EC:6.4.1.3]
		ko:K08094 hxlB; 6-phospho-3-hexuloisomerase [EC:5.3.1.27]
		ko:K11532 glpX-SEBP; fructose-1,6-bisphosphatase II / sedoheptulose-1,7-bisphosphatase [EC:3.1.3.11 3.1.3.37]
		ko:K15022 fdhB; formate dehydrogenase (NADP+) beta subunit [EC:1.17.1.10]
		ko:K16306 fructose-bisphosphate aldolase / 2-amino-3
		ko:K17989 SDS; L-serine/L-threonine ammonia-lyase [EC:4.3.1.17 4.3.1.19]
		ko:K18118 aarC; succinyl-CoA:acetate CoA-transferase [EC:2.8.3.18]
9	map02060 Phosphotransferase system (PTS) (10)	ko:K02745 agaV; N-acetylgalactosamine PTS system EIIB component [EC:2.7.1.-]
		ko:K02746 agaW; N-acetylgalactosamine PTS system EIIC component
		ko:K02747 agaE; N-acetylgalactosamine PTS system EIID component
		ko:K02759 celC; cellobiose PTS system EIIA component [EC:2.7.1.196 2.7.1.205]
		ko:K02760 celA; cellobiose PTS system EIIB component [EC:2.7.1.196 2.7.1.205]
		ko:K02796 manZ; mannose PTS system EIID component
		ko:K19506 gfrA; fructoselysine/glucoselysine PTS system EIIA component [EC:2.7.1.-]
		ko:K19507 gfrB; fructoselysine/glucoselysine PTS system EIIB component [EC:2.7.1.-]
		ko:K19508 gfrC; fructoselysine/glucoselysine PTS system EIIC component
		ko:K19509 gfrD; fructoselysine/glucoselysine PTS system EIID component
10	map00920 Sulfur metabolism (9)	ko:K00392 sir; sulfite reductase (ferredoxin) [EC:1.8.7.1]
		ko:K00955 cysNC; bifunctional enzyme CysN/CysC [EC:2.7.7.4 2.7.1.25]
		ko:K00957 cysD; sulfate adenylyltransferase subunit 2 [EC:2.7.7.4]
		ko:K00958 sat; sulfate adenylyltransferase [EC:2.7.7.4]
		ko:K07306 dmsA; anaerobic dimethyl sulfoxide reductase subunit A [EC:1.8.5.3]
		ko:K07307 dmsB; anaerobic dimethyl sulfoxide reductase subunit B
		ko:K08352 phsA; thiosulfate reductase / polysulfide reductase chain A [EC:1.8.5.5]
		ko:K10764 metZ; O-succinylhomoserine sulfhydrylase [EC:2.5.1.-]
		ko:K17228 sfnG; dimethylsulfone monooxygenase [EC:1.14.14.35]
11	map01240 Biosynthesis of cofactors (8)	ko:K00643 E2.3.1.37; 5-aminolevulinate synthase [EC:2.3.1.37]
		ko:K01579 panD; aspartate 1-decarboxylase [EC:4.1.1.11]
		ko:K02230 cobN; cobaltochelatase CobN [EC:6.6.1.2]
		ko:K02259 COX15; heme a synthase [EC:1.17.99.9]
		ko:K08097 comA; phosphosulfolactate synthase [EC:4.4.1.19]
		ko:K08973 hemJ; protoporphyrinogen IX oxidase [EC:1.3.99.-]
		ko:K09883 cobT; cobaltochelatase CobT [EC:6.6.1.2]
		ko:K13950 pabAB; para-aminobenzoate synthetase [EC:2.6.1.85]
12	map00860 Porphyrin and chlorophyll metabolism (8)	ko:K00510 HMOX1; heme oxygenase 1 [EC:1.14.14.18]
		ko:K00643 E2.3.1.37; 5-aminolevulinate synthase [EC:2.3.1.37]
		ko:K02230 cobN; cobaltochelatase CobN [EC:6.6.1.2]
		ko:K02259 COX15; heme a synthase [EC:1.17.99.9]
		ko:K03404 chlD; magnesium chelatase subunit D [EC:6.6.1.1]
		ko:K03405 chlI; magnesium chelatase subunit I [EC:6.6.1.1]
		ko:K08973 hemJ; protoporphyrinogen IX oxidase [EC:1.3.99.-]
		ko:K09883 cobT; cobaltochelatase CobT [EC:6.6.1.2]
13	map01230 Biosynthesis of amino acids (7)	ko:K00220 tyrC; cyclohexadieny/prephenate dehydrogenase [EC:1.3.1.43 1.3.1.12]
		ko:K04093 pheA1; chorismate mutase [EC:5.4.99.5]
		ko:K05602 hisN; histidinol-phosphatase [EC:3.1.3.15]
		ko:K05822 dapH; tetrahydrodipicolinate N-acetyltransferase [EC:2.3.1.89]
		ko:K08094 hxlB; 6-phospho-3-hexuloisomerase [EC:5.3.1.27]
		ko:K16306 fructose-bisphosphate aldolase / 2-amino-3
		ko:K17989 SDS; L-serine/L-threonine ammonia-lyase [EC:4.3.1.17 4.3.1.19]
14	map00650 Butanoate metabolism (7)	ko:K00023 phbB; acetoacetyl-CoA reductase [EC:1.1.1.36]
		ko:K00244 frdA; fumarate reductase flavoprotein subunit [EC:1.3.5.4]
		ko:K01615 gcdA; glutaconyl-CoA decarboxylase subunit alpha [EC:7.2.4.5]
		ko:K01907 AACS; acetoacetyl-CoA synthetase [EC:6.2.1.16]
		ko:K03821 phbC; polyhydroxyalkanoate synthase subunit PhaC [EC:2.3.1.-]
		ko:K05973 phaZ; poly(3-hydroxybutyrate) depolymerase [EC:3.1.1.75]
		ko:K18118 aarC; succinyl-CoA:acetate CoA-transferase [EC:2.8.3.18]
15	map00500 Starch and sucrose metabolism (6)	ko:K01236 treZ; maltooligosyltrehalose trehalohydrolase [EC:3.2.1.141]
		ko:K02759 celC; cellobiose PTS system EIIA component [EC:2.7.1.196 2.7.1.205]
		ko:K02760 celA; cellobiose PTS system EIIB component [EC:2.7.1.196 2.7.1.205]
		ko:K13057 treT; trehalose synthase [EC:2.4.1.245]
		ko:K16146 pep2; maltokinase [EC:2.7.1.175]
		ko:K16149 1
16	map03070 Bacterial secretion system (6)	ko:K03197 virB2; type IV secretion system protein VirB2
		ko:K03198 virB3; type IV secretion system protein VirB3
		ko:K11004 hlyB; ATP-binding cassette, subfamily B, bacterial HlyB/CyaB
		ko:K11016 shlA; hemolysin
		ko:K11017 shlB; hemolysin activation/secretion protein
		ko:K11912 ppkA; serine/threonine-protein kinase PpkA [EC:2.7.11.1]
17	map00680 Methane metabolism (6)	ko:K07812 torZ; trimethylamine-N-oxide reductase (cytochrome c) [EC:1.7.2.3]
		ko:K08094 hxlB; 6-phospho-3-hexuloisomerase [EC:5.3.1.27]
		ko:K08097 comA; phosphosulfolactate synthase [EC:4.4.1.19]
		ko:K11532 glpX-SEBP; fructose-1,6-bisphosphatase II / sedoheptulose-1,7-bisphosphatase [EC:3.1.3.11 3.1.3.37]
		ko:K15022 fdhB; formate dehydrogenase (NADP+) beta subunit [EC:1.17.1.10]
		ko:K16306 fructose-bisphosphate aldolase / 2-amino-3
18	map00640 Propanoate metabolism (5)	ko:K01574 adc; acetoacetate decarboxylase [EC:4.1.1.4]
		ko:K01578 MLYCD; malonyl-CoA decarboxylase [EC:4.1.1.9]
		ko:K01847 MUT; methylmalonyl-CoA mutase [EC:5.4.99.2]
		ko:K01962 accA; acetyl-CoA carboxylase carboxyl transferase subunit alpha [EC:6.4.1.2 2.1.3.15]
		ko:K01965 PCCA; propionyl-CoA carboxylase alpha chain [EC:6.4.1.3]
19	map00280 Valine, leucine and isoleucine degradation (5)	ko:K01847 MUT; methylmalonyl-CoA mutase [EC:5.4.99.2]
		ko:K01907 AACS; acetoacetyl-CoA synthetase [EC:6.2.1.16]
		ko:K01965 PCCA; propionyl-CoA carboxylase alpha chain [EC:6.4.1.3]
		ko:K01969 E6.4.1.4B; 3-methylcrotonyl-CoA carboxylase beta subunit [EC:6.4.1.4]
		ko:K18661 matB; malonyl-CoA/methylmalonyl-CoA synthetase [EC:6.2.1.-]
20	map00261 Monobactam biosynthesis (5)	ko:K00955 cysNC; bifunctional enzyme CysN/CysC [EC:2.7.7.4 2.7.1.25]
		ko:K00957 cysD; sulfate adenylyltransferase subunit 2 [EC:2.7.7.4]
		ko:K00958 sat; sulfate adenylyltransferase [EC:2.7.7.4]
		ko:K05375 mbtH; MbtH protein
		ko:K16422 hmo; 4-hydroxymandelate oxidase [EC:1.1.3.46]
21	map04714 Thermogenesis (5)	ko:K00411 UQCRFS1; ubiquinol-cytochrome c reductase iron-sulfur subunit [EC:7.1.1.8]
		ko:K00412 CYTB; ubiquinol-cytochrome c reductase cytochrome b subunit
		ko:K00413 CYC1; ubiquinol-cytochrome c reductase cytochrome c1 subunit
		ko:K02258 COX11; cytochrome c oxidase assembly protein subunit 11
		ko:K02259 COX15; heme a synthase [EC:1.17.99.9]
22	map00620 Pyruvate metabolism (4)	ko:K00102 LDHD; D-lactate dehydrogenase (cytochrome) [EC:1.1.2.4]
		ko:K00244 frdA; fumarate reductase flavoprotein subunit [EC:1.3.5.4]
		ko:K01962 accA; acetyl-CoA carboxylase carboxyl transferase subunit alpha [EC:6.4.1.2 2.1.3.15]
		ko:K18118 aarC; succinyl-CoA:acetate CoA-transferase [EC:2.8.3.18]
23	map00270 Cysteine and methionine metabolism (4)	ko:K08965 mtnW; 2,3-diketo-5-methylthiopentyl-1-phosphate enolase [EC:5.3.2.5]
		ko:K10764 metZ; O-succinylhomoserine sulfhydrylase [EC:2.5.1.-]
		ko:K13061 rhlI; acyl homoserine lactone synthase [EC:2.3.1.184]
		ko:K17989 SDS; L-serine/L-threonine ammonia-lyase [EC:4.3.1.17 4.3.1.19]
24	map00051 Fructose and mannose metabolism (4)	ko:K01818 fucI; L-fucose/D-arabinose isomerase [EC:5.3.1.25 5.3.1.3]
		ko:K02796 manZ; mannose PTS system EIID component
		ko:K11532 glpX-SEBP; fructose-1,6-bisphosphatase II / sedoheptulose-1,7-bisphosphatase [EC:3.1.3.11 3.1.3.37]
		ko:K16306 fructose-bisphosphate aldolase / 2-amino-3
25	map00790 Folate biosynthesis (4)	ko:K01724 PCBD; 4a-hydroxytetrahydrobiopterin dehydratase [EC:4.2.1.96]
		ko:K13950 pabAB; para-aminobenzoate synthetase [EC:2.6.1.85]
		ko:K18589 dfrA1; dihydrofolate reductase (trimethoprim resistance protein) [EC:1.5.1.3]
		ko:K18824 sul2; dihydropteroate synthase type 2 [EC:2.5.1.15]
26	map01501 beta-Lactam resistance (4)	ko:K17836 penP; beta-lactamase class A [EC:3.5.2.6]
		ko:K18792 blaOXA-10; beta-lactamase class D OXA-10 [EC:3.5.2.6]
		ko:K18970 blaGES; beta-lactamase class A GES [EC:3.5.2.6]
		ko:K19100 blaDHA; beta-lactamase class C DHA [EC:3.5.2.6]
27	map00450 Selenocompound metabolism (4)	ko:K00955 cysNC; bifunctional enzyme CysN/CysC [EC:2.7.7.4 2.7.1.25]
		ko:K00957 cysD; sulfate adenylyltransferase subunit 2 [EC:2.7.7.4]
		ko:K00958 sat; sulfate adenylyltransferase [EC:2.7.7.4]
		ko:K01042 selA; L-seryl-tRNA(Ser) seleniumtransferase [EC:2.9.1.1]
28	map00720 Carbon fixation pathways in prokaryotes (4)	ko:K00244 frdA; fumarate reductase flavoprotein subunit [EC:1.3.5.4]
		ko:K01847 MUT; methylmalonyl-CoA mutase [EC:5.4.99.2]
		ko:K01962 accA; acetyl-CoA carboxylase carboxyl transferase subunit alpha [EC:6.4.1.2 2.1.3.15]
		ko:K15022 fdhB; formate dehydrogenase (NADP+) beta subunit [EC:1.17.1.10]
29	map00630 Glyoxylate and dicarboxylate metabolism (4)	ko:K00023 phbB; acetoacetyl-CoA reductase [EC:1.1.1.36]
		ko:K01569 oxdD; oxalate decarboxylase [EC:4.1.1.2]
		ko:K01847 MUT; methylmalonyl-CoA mutase [EC:5.4.99.2]
		ko:K01965 PCCA; propionyl-CoA carboxylase alpha chain [EC:6.4.1.3]
30	map00260 Glycine, serine and threonine metabolism (4)	ko:K00613 GATM; glycine amidinotransferase [EC:2.1.4.1]
		ko:K00639 kbl; glycine C-acetyltransferase [EC:2.3.1.29]
		ko:K00643 E2.3.1.37; 5-aminolevulinate synthase [EC:2.3.1.37]
		ko:K17989 SDS; L-serine/L-threonine ammonia-lyase [EC:4.3.1.17 4.3.1.19]
31	map00520 Amino sugar and nucleotide sugar metabolism (3)	ko:K00992 murU; N-acetyl-alpha-D-muramate 1-phosphate uridylyltransferase [EC:2.7.7.99]
		ko:K02796 manZ; mannose PTS system EIID component
		ko:K15921 xynD; arabinoxylan arabinofuranohydrolase [EC:3.2.1.55]
32	map00400 Phenylalanine, tyrosine and tryptophan biosynthesis (3)	ko:K00220 tyrC; cyclohexadieny/prephenate dehydrogenase [EC:1.3.1.43 1.3.1.12]
		ko:K04093 pheA1; chorismate mutase [EC:5.4.99.5]
		ko:K16306 fructose-bisphosphate aldolase / 2-amino-3
33	map04932 Non-alcoholic fatty liver disease (3)	ko:K00411 UQCRFS1; ubiquinol-cytochrome c reductase iron-sulfur subunit [EC:7.1.1.8]
		ko:K00412 CYTB; ubiquinol-cytochrome c reductase cytochrome b subunit
		ko:K00413 CYC1; ubiquinol-cytochrome c reductase cytochrome c1 subunit
34	map05010 Alzheimer disease (3)	ko:K00411 UQCRFS1; ubiquinol-cytochrome c reductase iron-sulfur subunit [EC:7.1.1.8]
		ko:K00412 CYTB; ubiquinol-cytochrome c reductase cytochrome b subunit
		ko:K00413 CYC1; ubiquinol-cytochrome c reductase cytochrome c1 subunit
35	map04260 Cardiac muscle contraction (3)	ko:K00411 UQCRFS1; ubiquinol-cytochrome c reductase iron-sulfur subunit [EC:7.1.1.8]
		ko:K00412 CYTB; ubiquinol-cytochrome c reductase cytochrome b subunit
		ko:K00413 CYC1; ubiquinol-cytochrome c reductase cytochrome c1 subunit
36	map05022 Pathways of neurodegeneration - multiple diseases (3)	ko:K00411 UQCRFS1; ubiquinol-cytochrome c reductase iron-sulfur subunit [EC:7.1.1.8]
		ko:K00412 CYTB; ubiquinol-cytochrome c reductase cytochrome b subunit
		ko:K00413 CYC1; ubiquinol-cytochrome c reductase cytochrome c1 subunit
37	map05016 Huntington disease (3)	ko:K00411 UQCRFS1; ubiquinol-cytochrome c reductase iron-sulfur subunit [EC:7.1.1.8]
		ko:K00412 CYTB; ubiquinol-cytochrome c reductase cytochrome b subunit
		ko:K00413 CYC1; ubiquinol-cytochrome c reductase cytochrome c1 subunit
38	map02025 Biofilm formation - Pseudomonas aeruginosa (3)	ko:K01768 E4.6.1.1; adenylate cyclase [EC:4.6.1.1]
		ko:K11912 ppkA; serine/threonine-protein kinase PpkA [EC:2.7.11.1]
		ko:K13061 rhlI; acyl homoserine lactone synthase [EC:2.3.1.184]
39	map00340 Histidine metabolism (3)	ko:K05602 hisN; histidinol-phosphatase [EC:3.1.3.15]
		ko:K05603 hutF; formimidoylglutamate deiminase [EC:3.5.3.13]
		ko:K17363 urdA; urocanate reductase [EC:1.3.99.33]
40	map05014 Amyotrophic lateral sclerosis (3)	ko:K00411 UQCRFS1; ubiquinol-cytochrome c reductase iron-sulfur subunit [EC:7.1.1.8]
		ko:K00412 CYTB; ubiquinol-cytochrome c reductase cytochrome b subunit
		ko:K00413 CYC1; ubiquinol-cytochrome c reductase cytochrome c1 subunit
41	map00052 Galactose metabolism (3)	ko:K02745 agaV; N-acetylgalactosamine PTS system EIIB component [EC:2.7.1.-]
		ko:K02746 agaW; N-acetylgalactosamine PTS system EIIC component
		ko:K02747 agaE; N-acetylgalactosamine PTS system EIID component
42	map00030 Pentose phosphate pathway (3)	ko:K08094 hxlB; 6-phospho-3-hexuloisomerase [EC:5.3.1.27]
		ko:K11532 glpX-SEBP; fructose-1,6-bisphosphatase II / sedoheptulose-1,7-bisphosphatase [EC:3.1.3.11 3.1.3.37]
		ko:K16306 fructose-bisphosphate aldolase / 2-amino-3
43	map05020 Prion disease (3)	ko:K00411 UQCRFS1; ubiquinol-cytochrome c reductase iron-sulfur subunit [EC:7.1.1.8]
		ko:K00412 CYTB; ubiquinol-cytochrome c reductase cytochrome b subunit
		ko:K00413 CYC1; ubiquinol-cytochrome c reductase cytochrome c1 subunit
44	map05415 Diabetic cardiomyopathy (3)	ko:K00411 UQCRFS1; ubiquinol-cytochrome c reductase iron-sulfur subunit [EC:7.1.1.8]
		ko:K00412 CYTB; ubiquinol-cytochrome c reductase cytochrome b subunit
		ko:K00413 CYC1; ubiquinol-cytochrome c reductase cytochrome c1 subunit
45	map05012 Parkinson disease (3)	ko:K00411 UQCRFS1; ubiquinol-cytochrome c reductase iron-sulfur subunit [EC:7.1.1.8]
		ko:K00412 CYTB; ubiquinol-cytochrome c reductase cytochrome b subunit
		ko:K00413 CYC1; ubiquinol-cytochrome c reductase cytochrome c1 subunit
46	map00330 Arginine and proline metabolism (2)	ko:K00613 GATM; glycine amidinotransferase [EC:2.1.4.1]
		ko:K09123 lhpI; cis-L-3-hydroxyproline dehydratase [EC:4.2.1.171]
47	map00410 beta-Alanine metabolism (2)	ko:K01578 MLYCD; malonyl-CoA decarboxylase [EC:4.1.1.9]
		ko:K01579 panD; aspartate 1-decarboxylase [EC:4.1.1.11]
48	map00430 Taurine and hypotaurine metabolism (2)	ko:K03852 xsc; sulfoacetaldehyde acetyltransferase [EC:2.3.3.15]
		ko:K15371 GDH2; glutamate dehydrogenase [EC:1.4.1.2]
49	map00910 Nitrogen metabolism (2)	ko:K00459 ncd2; nitronate monooxygenase [EC:1.13.12.16]
		ko:K15371 GDH2; glutamate dehydrogenase [EC:1.4.1.2]
50	map00010 Glycolysis / Gluconeogenesis (2)	ko:K11532 glpX-SEBP; fructose-1,6-bisphosphatase II / sedoheptulose-1,7-bisphosphatase [EC:3.1.3.11 3.1.3.37]
		ko:K16306 fructose-bisphosphate aldolase / 2-amino-3
51	map00511 Other glycan degradation (2)	ko:K01191 MAN2C1; alpha-mannosidase [EC:3.2.1.24]
		ko:K01444 AGA; N4-(beta-N-acetylglucosaminyl)-L-asparaginase [EC:3.5.1.26]
52	map02024 Quorum sensing (2)	ko:K13061 rhlI; acyl homoserine lactone synthase [EC:2.3.1.184]
		ko:K15654 srfAA; surfactin family lipopeptide synthetase A
53	map00220 Arginine biosynthesis (2)	ko:K01478 arcA; arginine deiminase [EC:3.5.3.6]
		ko:K15371 GDH2; glutamate dehydrogenase [EC:1.4.1.2]
54	map00040 Pentose and glucuronate interconversions (2)	ko:K01818 fucI; L-fucose/D-arabinose isomerase [EC:5.3.1.25 5.3.1.3]
		ko:K05352 tarJ; ribitol-5-phosphate 2-dehydrogenase (NADP+) [EC:1.1.1.405]
55	map00020 Citrate cycle (TCA cycle) (2)	ko:K00244 frdA; fumarate reductase flavoprotein subunit [EC:1.3.5.4]
		ko:K18118 aarC; succinyl-CoA:acetate CoA-transferase [EC:2.8.3.18]
56	map04072 Phospholipase D signaling pathway (1)	ko:K00901 dgkA; diacylglycerol kinase (ATP) [EC:2.7.1.107]
57	map01212 Fatty acid metabolism (1)	ko:K01962 accA; acetyl-CoA carboxylase carboxyl transferase subunit alpha [EC:6.4.1.2 2.1.3.15]
58	map04721 Synaptic vesicle cycle (1)	ko:K06027 NSF; vesicle-fusing ATPase [EC:3.6.4.6]
59	map00072 Synthesis and degradation of ketone bodies (1)	ko:K01574 adc; acetoacetate decarboxylase [EC:4.1.1.4]
60	map04138 Autophagy - yeast (1)	ko:K06027 NSF; vesicle-fusing ATPase [EC:3.6.4.6]
61	map00561 Glycerolipid metabolism (1)	ko:K00901 dgkA; diacylglycerol kinase (ATP) [EC:2.7.1.107]
62	map05418 Fluid shear stress and atherosclerosis (1)	ko:K00510 HMOX1; heme oxygenase 1 [EC:1.14.14.18]
63	map00670 One carbon pool by folate (1)	ko:K18589 dfrA1; dihydrofolate reductase (trimethoprim resistance protein) [EC:1.5.1.3]
64	map00541 O-Antigen nucleotide sugar biosynthesis (1)	ko:K02805 wecE; dTDP-4-amino-4,6-dideoxygalactose transaminase [EC:2.6.1.59]
65	map04361 Axon regeneration (1)	ko:K00901 dgkA; diacylglycerol kinase (ATP) [EC:2.7.1.107]
66	map05200 Pathways in cancer (1)	ko:K00510 HMOX1; heme oxygenase 1 [EC:1.14.14.18]
67	map04141 Protein processing in endoplasmic reticulum (1)	ko:K07151 STT3; dolichyl-diphosphooligosaccharide---protein glycosyltransferase [EC:2.4.99.18]
68	map00997 Biosynthesis of various secondary metabolites - part 3 (1)	ko:K17835 griH; 3-amino-4-hydroxybenzoic acid synthase [EC:4.1.99.20]
69	map04113 Meiosis - yeast (1)	ko:K01768 E4.6.1.1; adenylate cyclase [EC:4.6.1.1]
70	map04112 Cell cycle - Caulobacter (1)	ko:K13583 gcrA; GcrA cell cycle regulator
71	map00290 Valine, leucine and isoleucine biosynthesis (1)	ko:K17989 SDS; L-serine/L-threonine ammonia-lyase [EC:4.3.1.17 4.3.1.19]
72	map04066 HIF-1 signaling pathway (1)	ko:K00510 HMOX1; heme oxygenase 1 [EC:1.14.14.18]
73	map05134 Legionellosis (1)	ko:K03197 virB2; type IV secretion system protein VirB2
74	map04146 Peroxisome (1)	ko:K01578 MLYCD; malonyl-CoA decarboxylase [EC:4.1.1.9]
75	map01055 Biosynthesis of vancomycin group antibiotics (1)	ko:K16422 hmo; 4-hydroxymandelate oxidase [EC:1.1.3.46]
76	map00440 Phosphonate and phosphinate metabolism (1)	ko:K09994 phnO; (aminoalkyl)phosphonate N-acetyltransferase [EC:2.3.1.280]
77	map05225 Hepatocellular carcinoma (1)	ko:K00510 HMOX1; heme oxygenase 1 [EC:1.14.14.18]
78	map00300 Lysine biosynthesis (1)	ko:K05822 dapH; tetrahydrodipicolinate N-acetyltransferase [EC:2.3.1.89]
79	map00564 Glycerophospholipid metabolism (1)	ko:K00901 dgkA; diacylglycerol kinase (ATP) [EC:2.7.1.107]
80	map05133 Pertussis (1)	ko:K11004 hlyB; ATP-binding cassette, subfamily B, bacterial HlyB/CyaB
81	map00061 Fatty acid biosynthesis (1)	ko:K01962 accA; acetyl-CoA carboxylase carboxyl transferase subunit alpha [EC:6.4.1.2 2.1.3.15]
82	map01051 Biosynthesis of ansamycins (1)	ko:K16016 rifK; 3-amino-5-hydroxybenzoate synthase [EC:4.2.1.144 2.6.1.-]
83	map04962 Vasopressin-regulated water reabsorption (1)	ko:K06027 NSF; vesicle-fusing ATPase [EC:3.6.4.6]
84	map04727 GABAergic synapse (1)	ko:K06027 NSF; vesicle-fusing ATPase [EC:3.6.4.6]
85	map00571 Lipoarabinomannan (LAM) biosynthesis (1)	ko:K13671 alpha-1
86	map01054 Nonribosomal peptide structures (1)	ko:K15654 srfAA; surfactin family lipopeptide synthetase A
87	map04978 Mineral absorption (1)	ko:K00510 HMOX1; heme oxygenase 1 [EC:1.14.14.18]
88	map05143 African trypanosomiasis (1)	ko:K14475 ICP; inhibitor of cysteine peptidase
89	map00510 N-Glycan biosynthesis (1)	ko:K07151 STT3; dolichyl-diphosphooligosaccharide---protein glycosyltransferase [EC:2.4.99.18]
90	map00572 Arabinogalactan biosynthesis - Mycobacterium (1)	ko:K16870 wbbL; N-acetylglucosaminyl-diphospho-decaprenol L-rhamnosyltransferase [EC:2.4.1.289]
91	map02040 Flagellar assembly (1)	ko:K13820 fliR-flhB; flagellar biosynthesis protein FliR/FlhB
92	map04142 Lysosome (1)	ko:K01444 AGA; N4-(beta-N-acetylglucosaminyl)-L-asparaginase [EC:3.5.1.26]
93	map00480 Glutathione metabolism (1)	ko:K07160 pxpA; 5-oxoprolinase (ATP-hydrolysing) subunit A [EC:3.5.2.9]
94	map00250 Alanine, aspartate and glutamate metabolism (1)	ko:K15371 GDH2; glutamate dehydrogenase [EC:1.4.1.2]
95	map05231 Choline metabolism in cancer (1)	ko:K00901 dgkA; diacylglycerol kinase (ATP) [EC:2.7.1.107]
96	map04216 Ferroptosis (1)	ko:K00510 HMOX1; heme oxygenase 1 [EC:1.14.14.18]
97	map00770 Pantothenate and CoA biosynthesis (1)	ko:K01579 panD; aspartate 1-decarboxylase [EC:4.1.1.11]
98	map00998 Biosynthesis of various secondary metabolites - part 2 (1)	ko:K19548 bacC; dihydroanticapsin dehydrogenase [EC:1.1.1.385]
99	map04152 AMPK signaling pathway (1)	ko:K01578 MLYCD; malonyl-CoA decarboxylase [EC:4.1.1.9]
100	map00362 Benzoate degradation (1)	ko:K01615 gcdA; glutaconyl-CoA decarboxylase subunit alpha [EC:7.2.4.5]
101	map00513 Various types of N-glycan biosynthesis (1)	ko:K07151 STT3; dolichyl-diphosphooligosaccharide---protein glycosyltransferase [EC:2.4.99.18]
102	map00710 Carbon fixation in photosynthetic organisms (1)	ko:K11532 glpX-SEBP; fructose-1,6-bisphosphatase II / sedoheptulose-1,7-bisphosphatase [EC:3.1.3.11 3.1.3.37]
103	map01053 Biosynthesis of siderophore group nonribosomal peptides (1)	ko:K12240 pchF; pyochelin synthetase
104	map00401 Novobiocin biosynthesis (1)	ko:K00220 tyrC; cyclohexadieny/prephenate dehydrogenase [EC:1.3.1.43 1.3.1.12]
105	map05206 MicroRNAs in cancer (1)	ko:K00510 HMOX1; heme oxygenase 1 [EC:1.14.14.18]
106	map00240 Pyrimidine metabolism (1)	ko:K15519 dck; deoxyadenosine/deoxycytidine kinase [EC:2.7.1.76 2.7.1.74]
107	map03018 RNA degradation (1)	ko:K11927 rhlE; ATP-dependent RNA helicase RhlE [EC:3.6.4.13]
108	map03420 Nucleotide excision repair (1)	ko:K10843 ERCC3; DNA excision repair protein ERCC-3 [EC:3.6.4.12]
109	map00930 Caprolactam degradation (1)	ko:K06446 DCAA; acyl-CoA dehydrogenase [EC:1.3.99.-]
110	map03022 Basal transcription factors (1)	ko:K10843 ERCC3; DNA excision repair protein ERCC-3 [EC:3.6.4.12]
111	map00350 Tyrosine metabolism (1)	ko:K16165 nagK; fumarylpyruvate hydrolase [EC:3.7.1.20]
112	map01502 Vancomycin resistance (1)	ko:K08641 vanX; zinc D-Ala-D-Ala dipeptidase [EC:3.4.13.22]
113	map04070 Phosphatidylinositol signaling system (1)	ko:K00901 dgkA; diacylglycerol kinase (ATP) [EC:2.7.1.107]
114	map00311 Penicillin and cephalosporin biosynthesis (1)	ko:K17836 penP; beta-lactamase class A [EC:3.5.2.6]
115	map04213 Longevity regulating pathway - multiple species (1)	ko:K01768 E4.6.1.1; adenylate cyclase [EC:4.6.1.1]
116	map00472 D-Arginine and D-ornithine metabolism (1)	ko:K19746 dauA; D-arginine dehydrogenase [EC:1.4.99.6]
117	map00970 Aminoacyl-tRNA biosynthesis (1)	ko:K01042 selA; L-seryl-tRNA(Ser) seleniumtransferase [EC:2.9.1.1]
118	map00785 Lipoic acid metabolism (1)	ko:K09711 lipS1; lipoyl synthase

## Sheet: BRITE
S/N	BRITE ENTRIES	KOs
1	ko01000 Enzymes (163)	ko:K19548 bacC; dihydroanticapsin dehydrogenase [EC:1.1.1.385]
		ko:K16422 hmo; 4-hydroxymandelate oxidase [EC:1.1.3.46]
		ko:K00154 E1.2.1.68; coniferyl-aldehyde dehydrogenase [EC:1.2.1.68]
		ko:K00220 tyrC; cyclohexadieny/prephenate dehydrogenase [EC:1.3.1.43 1.3.1.12]
		ko:K08973 hemJ; protoporphyrinogen IX oxidase [EC:1.3.99.-]
		ko:K19713 tsdA; thiosulfate dehydrogenase [EC:1.8.2.2]
		ko:K00392 sir; sulfite reductase (ferredoxin) [EC:1.8.7.1]
		ko:K00510 HMOX1; heme oxygenase 1 [EC:1.14.14.18]
		ko:K17228 sfnG; dimethylsulfone monooxygenase [EC:1.14.14.35]
		ko:K00643 E2.3.1.37; 5-aminolevulinate synthase [EC:2.3.1.37]
		ko:K07739 ELP3; elongator complex protein 3 [EC:2.3.1.48]
		ko:K05822 dapH; tetrahydrodipicolinate N-acetyltransferase [EC:2.3.1.89]
		ko:K13061 rhlI; acyl homoserine lactone synthase [EC:2.3.1.184]
		ko:K03852 xsc; sulfoacetaldehyde acetyltransferase [EC:2.3.3.15]
		ko:K13693 gpgS; glucosyl-3-phosphoglycerate synthase [EC:2.4.1.266]
		ko:K03813 modD; molybdenum transport protein [EC:2.4.2.-]
		ko:K07151 STT3; dolichyl-diphosphooligosaccharide---protein glycosyltransferase [EC:2.4.99.18]
		ko:K16700 amsB; amylovoran biosynthesis glycosyltransferase AmsB [EC:2.4.-.-]
		ko:K10764 metZ; O-succinylhomoserine sulfhydrylase [EC:2.5.1.-]
		ko:K13950 pabAB; para-aminobenzoate synthetase [EC:2.6.1.85]
		ko:K15519 dck; deoxyadenosine/deoxycytidine kinase [EC:2.7.1.76 2.7.1.74]
		ko:K10353 E2.7.1.76; deoxyadenosine kinase [EC:2.7.1.76]
		ko:K15518 dgk; deoxyguanosine kinase [EC:2.7.1.113]
		ko:K02745 agaV; N-acetylgalactosamine PTS system EIIB component [EC:2.7.1.-]
		ko:K19506 gfrA; fructoselysine/glucoselysine PTS system EIIA component [EC:2.7.1.-]
		ko:K19507 gfrB; fructoselysine/glucoselysine PTS system EIIB component [EC:2.7.1.-]
		ko:K00958 sat; sulfate adenylyltransferase [EC:2.7.7.4]
		ko:K07067 disA; diadenylate cyclase [EC:2.7.7.85]
		ko:K04757 rsbW; serine/threonine-protein kinase RsbW [EC:2.7.11.1]
		ko:K11912 ppkA; serine/threonine-protein kinase PpkA [EC:2.7.11.1]
		ko:K02482 flgS; two-component system, NtrC family, sensor kinase [EC:2.7.13.3]
		ko:K07704 lytS; two-component system, LytTR family, sensor histidine kinase LytS [EC:2.7.13.3]
		ko:K07717 ycbA; two-component system, sensor histidine kinase YcbA [EC:2.7.13.3]
		ko:K15011 regB; two-component system, sensor histidine kinase RegB [EC:2.7.13.3]
		ko:K01023 assT; arylsulfate sulfotransferase [EC:2.8.2.22]
		ko:K11532 glpX-SEBP; fructose-1,6-bisphosphatase II / sedoheptulose-1,7-bisphosphatase [EC:3.1.3.11 3.1.3.37]
		ko:K05602 hisN; histidinol-phosphatase [EC:3.1.3.15]
		ko:K01120 cpdP; 3',5'-cyclic-nucleotide phosphodiesterase [EC:3.1.4.17]
		ko:K07160 pxpA; 5-oxoprolinase (ATP-hydrolysing) subunit A [EC:3.5.2.9]
		ko:K01478 arcA; arginine deiminase [EC:3.5.3.6]
		ko:K05603 hutF; formimidoylglutamate deiminase [EC:3.5.3.13]
		ko:K01569 oxdD; oxalate decarboxylase [EC:4.1.1.2]
		ko:K01578 MLYCD; malonyl-CoA decarboxylase [EC:4.1.1.9]
		ko:K01724 PCBD; 4a-hydroxytetrahydrobiopterin dehydratase [EC:4.2.1.96]
		ko:K17989 SDS; L-serine/L-threonine ammonia-lyase [EC:4.3.1.17 4.3.1.19]
		ko:K08097 comA; phosphosulfolactate synthase [EC:4.4.1.19]
		ko:K01768 E4.6.1.1; adenylate cyclase [EC:4.6.1.1]
		ko:K02082 agaS; tagatose-6-phosphate ketose/aldose isomerase [EC:5.-.-.-]
		ko:K09883 cobT; cobaltochelatase CobT [EC:6.6.1.2]
		ko:K00404 ccoN; cytochrome c oxidase cbb3-type subunit I [EC:7.1.1.9]
		ko:K02274 coxA; cytochrome c oxidase subunit I [EC:7.1.1.9]
		ko:K02275 coxB; cytochrome c oxidase subunit II [EC:7.1.1.9]
		ko:K02276 coxC; cytochrome c oxidase subunit III [EC:7.1.1.9]
		ko:K09689 kpsT; capsular polysaccharide transport system ATP-binding protein [EC:7.6.2.12]
		ko:K17363 urdA; urocanate reductase [EC:1.3.99.33]
		ko:K06446 DCAA; acyl-CoA dehydrogenase [EC:1.3.99.-]
		ko:K19746 dauA; D-arginine dehydrogenase [EC:1.4.99.6]
		ko:K18589 dfrA1; dihydrofolate reductase (trimethoprim resistance protein) [EC:1.5.1.3]
		ko:K00298 ceo; N5-(carboxyethyl)ornithine synthase [EC:1.5.1.24]
		ko:K07306 dmsA; anaerobic dimethyl sulfoxide reductase subunit A [EC:1.8.5.3]
		ko:K11178 yagS; xanthine dehydrogenase YagS FAD-binding subunit [EC:1.17.1.4]
		ko:K02259 COX15; heme a synthase [EC:1.17.99.9]
		ko:K18917 mrx1; mycoredoxin [EC:1.20.4.3]
		ko:K12297 rlmL; 23S rRNA (guanine2445-N2)-methyltransferase / 23S rRNA (guanine2069-N7)-methyltransferase [EC:2.1.1.173 2.1.1.264]
		ko:K00563 rlmA1; 23S rRNA (guanine745-N1)-methyltransferase [EC:2.1.1.187]
		ko:K13252 ptcA; putrescine carbamoyltransferase [EC:2.1.3.6]
		ko:K16306 fructose-bisphosphate aldolase / 2-amino-3
		ko:K19301 aac6-II; aminoglycoside 6'-N-acetyltransferase II [EC:2.3.1.82]
		ko:K13057 treT; trehalose synthase [EC:2.4.1.245]
		ko:K16870 wbbL; N-acetylglucosaminyl-diphospho-decaprenol L-rhamnosyltransferase [EC:2.4.1.289]
		ko:K13927 citXG; holo-ACP synthase / triphosphoribosyl-dephospho-CoA synthase [EC:2.7.7.61 2.4.2.52]
		ko:K18824 sul2; dihydropteroate synthase type 2 [EC:2.5.1.15]
		ko:K16016 rifK; 3-amino-5-hydroxybenzoate synthase [EC:4.2.1.144 2.6.1.-]
		ko:K00955 cysNC; bifunctional enzyme CysN/CysC [EC:2.7.7.4 2.7.1.25]
		ko:K00901 dgkA; diacylglycerol kinase (ATP) [EC:2.7.1.107]
		ko:K00992 murU; N-acetyl-alpha-D-muramate 1-phosphate uridylyltransferase [EC:2.7.7.99]
		ko:K07588 argK; LAO/AO transport system kinase [EC:2.7.-.-]
		ko:K01643 citF; citrate lyase subunit alpha / citrate CoA-transferase [EC:2.8.3.10]
		ko:K01042 selA; L-seryl-tRNA(Ser) seleniumtransferase [EC:2.9.1.1]
		ko:K05973 phaZ; poly(3-hydroxybutyrate) depolymerase [EC:3.1.1.75]
		ko:K07313 pphA; serine/threonine protein phosphatase 1 [EC:3.1.3.16]
		ko:K01975 thpR; RNA 2',3'-cyclic 3'-phosphodiesterase [EC:3.1.4.58]
		ko:K01191 MAN2C1; alpha-mannosidase [EC:3.2.1.24]
		ko:K15924 xynC; glucuronoarabinoxylan endo-1,4-beta-xylanase [EC:3.2.1.136]
		ko:K01236 treZ; maltooligosyltrehalose trehalohydrolase [EC:3.2.1.141]
		ko:K01274 E3.4.13.-; D-alanyl-D-alanine dipeptidase [EC:3.4.13.-]
		ko:K01299 E3.4.17.19; carboxypeptidase Taq [EC:3.4.17.19]
		ko:K13275 isp; major intracellular serine protease [EC:3.4.21.-]
		ko:K01444 AGA; N4-(beta-N-acetylglucosaminyl)-L-asparaginase [EC:3.5.1.26]
		ko:K18792 blaOXA-10; beta-lactamase class D OXA-10 [EC:3.5.2.6]
		ko:K18970 blaGES; beta-lactamase class A GES [EC:3.5.2.6]
		ko:K19100 blaDHA; beta-lactamase class C DHA [EC:3.5.2.6]
		ko:K06027 NSF; vesicle-fusing ATPase [EC:3.6.4.6]
		ko:K10843 ERCC3; DNA excision repair protein ERCC-3 [EC:3.6.4.12]
		ko:K16165 nagK; fumarylpyruvate hydrolase [EC:3.7.1.20]
		ko:K13281 uvsE; UV DNA damage endonuclease [EC:3.-.-.-]
		ko:K01574 adc; acetoacetate decarboxylase [EC:4.1.1.4]
		ko:K01644 citE; citrate lyase subunit beta / citryl-CoA lyase [EC:4.1.3.34]
		ko:K01727 hysA; hyaluronate lyase [EC:4.2.2.1]
		ko:K01732 E4.2.2.10; pectin lyase [EC:4.2.2.10]
		ko:K01818 fucI; L-fucose/D-arabinose isomerase [EC:5.3.1.25 5.3.1.3]
		ko:K08965 mtnW; 2,3-diketo-5-methylthiopentyl-1-phosphate enolase [EC:5.3.2.5]
		ko:K01847 MUT; methylmalonyl-CoA mutase [EC:5.4.99.2]
		ko:K01907 AACS; acetoacetyl-CoA synthetase [EC:6.2.1.16]
		ko:K18661 matB; malonyl-CoA/methylmalonyl-CoA synthetase [EC:6.2.1.-]
		ko:K17810 asl; D-aspartate ligase [EC:6.3.1.12]
		ko:K01965 PCCA; propionyl-CoA carboxylase alpha chain [EC:6.4.1.3]
		ko:K02230 cobN; cobaltochelatase CobN [EC:6.6.1.2]
		ko:K00023 phbB; acetoacetyl-CoA reductase [EC:1.1.1.36]
		ko:K05882 E1.1.1.91; aryl-alcohol dehydrogenase (NADP+) [EC:1.1.1.91]
		ko:K15509 hpsN; sulfopropanediol 3-dehydrogenase [EC:1.1.1.308]
		ko:K05352 tarJ; ribitol-5-phosphate 2-dehydrogenase (NADP+) [EC:1.1.1.405]
		ko:K00102 LDHD; D-lactate dehydrogenase (cytochrome) [EC:1.1.2.4]
		ko:K00244 frdA; fumarate reductase flavoprotein subunit [EC:1.3.5.4]
		ko:K15371 GDH2; glutamate dehydrogenase [EC:1.4.1.2]
		ko:K00311 ETFDH; electron-transferring-flavoprotein dehydrogenase [EC:1.5.5.1]
		ko:K07812 torZ; trimethylamine-N-oxide reductase (cytochrome c) [EC:1.7.2.3]
		ko:K08352 phsA; thiosulfate reductase / polysulfide reductase chain A [EC:1.8.5.5]
		ko:K15733 E1.11.1.19; dye decolorizing peroxidase [EC:1.11.1.19]
		ko:K04756 ahpD; lipoyl-dependent peroxiredoxin subunit D [EC:1.11.1.28]
		ko:K06441 E1.12.7.2G; ferredoxin hydrogenase gamma subunit [EC:1.12.7.2]
		ko:K00459 ncd2; nitronate monooxygenase [EC:1.13.12.16]
		ko:K11177 yagR; xanthine dehydrogenase YagR molybdenum-binding subunit [EC:1.17.1.4]
		ko:K15022 fdhB; formate dehydrogenase (NADP+) beta subunit [EC:1.17.1.10]
		ko:K01962 accA; acetyl-CoA carboxylase carboxyl transferase subunit alpha [EC:6.4.1.2 2.1.3.15]
		ko:K00613 GATM; glycine amidinotransferase [EC:2.1.4.1]
		ko:K00639 kbl; glycine C-acetyltransferase [EC:2.3.1.29]
		ko:K09994 phnO; (aminoalkyl)phosphonate N-acetyltransferase [EC:2.3.1.280]
		ko:K03821 phbC; polyhydroxyalkanoate synthase subunit PhaC [EC:2.3.1.-]
		ko:K16149 1
		ko:K15534 beta-D-galactosyl-(1->4)-L-rhamnose phosphorylase [EC:2.4.1.247]
		ko:K13671 alpha-1
		ko:K00809 DHPS; deoxyhypusine synthase [EC:2.5.1.46]
		ko:K02805 wecE; dTDP-4-amino-4,6-dideoxygalactose transaminase [EC:2.6.1.59]
		ko:K16146 pep2; maltokinase [EC:2.7.1.175]
		ko:K02759 celC; cellobiose PTS system EIIA component [EC:2.7.1.196 2.7.1.205]
		ko:K02760 celA; cellobiose PTS system EIIB component [EC:2.7.1.196 2.7.1.205]
		ko:K00957 cysD; sulfate adenylyltransferase subunit 2 [EC:2.7.7.4]
		ko:K18118 aarC; succinyl-CoA:acetate CoA-transferase [EC:2.8.3.18]
		ko:K03930 estA; putative tributyrin esterase [EC:3.1.1.-]
		ko:K15921 xynD; arabinoxylan arabinofuranohydrolase [EC:3.2.1.55]
		ko:K09935 ybiA; N-glycosidase YbiA [EC:3.2.2.-]
		ko:K08641 vanX; zinc D-Ala-D-Ala dipeptidase [EC:3.4.13.22]
		ko:K13282 cphB; cyanophycinase [EC:3.4.15.6]
		ko:K12685 ssp; subtilase-type serine protease [EC:3.4.21.-]
		ko:K17836 penP; beta-lactamase class A [EC:3.5.2.6]
		ko:K11927 rhlE; ATP-dependent RNA helicase RhlE [EC:3.6.4.13]
		ko:K01579 panD; aspartate 1-decarboxylase [EC:4.1.1.11]
		ko:K17835 griH; 3-amino-4-hydroxybenzoic acid synthase [EC:4.1.99.20]
		ko:K09123 lhpI; cis-L-3-hydroxyproline dehydratase [EC:4.2.1.171]
		ko:K01751 E4.3.1.15; diaminopropionate ammonia-lyase [EC:4.3.1.15]
		ko:K05873 cyaB; adenylate cyclase, class 2 [EC:4.6.1.1]
		ko:K02431 fucU; L-fucose mutarotase [EC:5.1.3.29]
		ko:K03769 ppiC; peptidyl-prolyl cis-trans isomerase C [EC:5.2.1.8]
		ko:K08094 hxlB; 6-phospho-3-hexuloisomerase [EC:5.3.1.27]
		ko:K04093 pheA1; chorismate mutase [EC:5.4.99.5]
		ko:K03802 cphA; cyanophycin synthetase [EC:6.3.2.29 6.3.2.30]
		ko:K01969 E6.4.1.4B; 3-methylcrotonyl-CoA carboxylase beta subunit [EC:6.4.1.4]
		ko:K03404 chlD; magnesium chelatase subunit D [EC:6.6.1.1]
		ko:K03405 chlI; magnesium chelatase subunit I [EC:6.6.1.1]
		ko:K00411 UQCRFS1; ubiquinol-cytochrome c reductase iron-sulfur subunit [EC:7.1.1.8]
		ko:K01615 gcdA; glutaconyl-CoA decarboxylase subunit alpha [EC:7.2.4.5]
		ko:K10041 peb1C; aspartate/glutamate/glutamine transport system ATP-binding protein [EC:7.4.2.1]
2	ko02044 Secretion system (14)	ko:K11004 hlyB; ATP-binding cassette, subfamily B, bacterial HlyB/CyaB
		ko:K02279 cpaB; pilus assembly protein CpaB
		ko:K02280 cpaC; pilus assembly protein CpaC
		ko:K03197 virB2; type IV secretion system protein VirB2
		ko:K03198 virB3; type IV secretion system protein VirB3
		ko:K11912 ppkA; serine/threonine-protein kinase PpkA [EC:2.7.11.1]
		ko:K13820 fliR-flhB; flagellar biosynthesis protein FliR/FlhB
		ko:K12070 traI; conjugal transfer pilus assembly protein TraI
		ko:K11016 shlA; hemolysin
		ko:K02282 cpaE; pilus assembly protein CpaE
		ko:K12071 traD; conjugal transfer pilus assembly protein TraD
		ko:K12685 ssp; subtilase-type serine protease [EC:3.4.21.-]
		ko:K12686 apeE; outer membrane lipase/esterase
		ko:K11017 shlB; hemolysin activation/secretion protein
3	ko02022 Two-component system (8)	ko:K07704 lytS; two-component system, LytTR family, sensor histidine kinase LytS [EC:2.7.13.3]
		ko:K02482 flgS; two-component system, NtrC family, sensor kinase [EC:2.7.13.3]
		ko:K07717 ycbA; two-component system, sensor histidine kinase YcbA [EC:2.7.13.3]
		ko:K15011 regB; two-component system, sensor histidine kinase RegB [EC:2.7.13.3]
		ko:K15012 regA; two-component system, response regulator RegA
		ko:K07684 narL; two-component system, NarL family, nitrate/nitrite response regulator NarL
		ko:K11712 dctR; two-component system, LuxR family, response regulator DctR
		ko:K13041 ttrR; two-component system, LuxR family, response regulator TtrR
4	ko01504 Antimicrobial resistance genes (8)	ko:K18970 blaGES; beta-lactamase class A GES [EC:3.5.2.6]
		ko:K18792 blaOXA-10; beta-lactamase class D OXA-10 [EC:3.5.2.6]
		ko:K19100 blaDHA; beta-lactamase class C DHA [EC:3.5.2.6]
		ko:K19301 aac6-II; aminoglycoside 6'-N-acetyltransferase II [EC:2.3.1.82]
		ko:K18824 sul2; dihydropteroate synthase type 2 [EC:2.5.1.15]
		ko:K18589 dfrA1; dihydrofolate reductase (trimethoprim resistance protein) [EC:1.5.1.3]
		ko:K17836 penP; beta-lactamase class A [EC:3.5.2.6]
		ko:K08641 vanX; zinc D-Ala-D-Ala dipeptidase [EC:3.4.13.22]
5	ko01001 Protein kinases (6)	ko:K11912 ppkA; serine/threonine-protein kinase PpkA [EC:2.7.11.1]
		ko:K04757 rsbW; serine/threonine-protein kinase RsbW [EC:2.7.11.1]
		ko:K07704 lytS; two-component system, LytTR family, sensor histidine kinase LytS [EC:2.7.13.3]
		ko:K02482 flgS; two-component system, NtrC family, sensor kinase [EC:2.7.13.3]
		ko:K07717 ycbA; two-component system, sensor histidine kinase YcbA [EC:2.7.13.3]
		ko:K15011 regB; two-component system, sensor histidine kinase RegB [EC:2.7.13.3]
6	ko01003 Glycosyltransferases (5)	ko:K07151 STT3; dolichyl-diphosphooligosaccharide---protein glycosyltransferase [EC:2.4.99.18]
		ko:K13693 gpgS; glucosyl-3-phosphoglycerate synthase [EC:2.4.1.266]
		ko:K16700 amsB; amylovoran biosynthesis glycosyltransferase AmsB [EC:2.4.-.-]
		ko:K16870 wbbL; N-acetylglucosaminyl-diphospho-decaprenol L-rhamnosyltransferase [EC:2.4.1.289]
		ko:K13671 alpha-1
7	ko01002 Peptidases and inhibitors (4)	ko:K01299 E3.4.17.19; carboxypeptidase Taq [EC:3.4.17.19]
		ko:K13275 isp; major intracellular serine protease [EC:3.4.21.-]
		ko:K08641 vanX; zinc D-Ala-D-Ala dipeptidase [EC:3.4.13.22]
		ko:K13282 cphB; cyanophycinase [EC:3.4.15.6]
8	ko03036 Chromosome and associated proteins (4)	ko:K07739 ELP3; elongator complex protein 3 [EC:2.3.1.48]
		ko:K05516 cbpA; curved DNA-binding protein
		ko:K13052 divIC; cell division protein DivIC
		ko:K04074 divIVA; cell division initiation protein
9	ko03110 Chaperones and folding catalysts (4)	ko:K05516 cbpA; curved DNA-binding protein
		ko:K13275 isp; major intracellular serine protease [EC:3.4.21.-]
		ko:K09796 pccA; periplasmic copper chaperone A
		ko:K03769 ppiC; peptidyl-prolyl cis-trans isomerase C [EC:5.2.1.8]
10	ko02035 Bacterial motility proteins (4)	ko:K02279 cpaB; pilus assembly protein CpaB
		ko:K02280 cpaC; pilus assembly protein CpaC
		ko:K13820 fliR-flhB; flagellar biosynthesis protein FliR/FlhB
		ko:K02282 cpaE; pilus assembly protein CpaE
11	ko02048 Prokaryotic defense system (3)	ko:K07061 cmr1; CRISPR-associated protein Cmr1
		ko:K18923 stbD; antitoxin StbD
		ko:K07723 ndoAI; CopG family transcriptional regulator / antitoxin EndoAI
12	ko03016 Transfer RNA biogenesis (3)	ko:K07739 ELP3; elongator complex protein 3 [EC:2.3.1.48]
		ko:K01975 thpR; RNA 2',3'-cyclic 3'-phosphodiesterase [EC:3.1.4.58]
		ko:K06020 ettA; energy-dependent translational throttle protein EttA
13	ko03021 Transcription machinery (3)	ko:K03090 sigB; RNA polymerase sigma-B factor
		ko:K04757 rsbW; serine/threonine-protein kinase RsbW [EC:2.7.11.1]
		ko:K10843 ERCC3; DNA excision repair protein ERCC-3 [EC:3.6.4.12]
14	ko02042 Bacterial toxins (3)	ko:K11016 shlA; hemolysin
		ko:K11060 entB; probable enterotoxin B
		ko:K11017 shlB; hemolysin activation/secretion protein
15	ko01007 Amino acid related enzymes (3)	ko:K00643 E2.3.1.37; 5-aminolevulinate synthase [EC:2.3.1.37]
		ko:K00639 kbl; glycine C-acetyltransferase [EC:2.3.1.29]
		ko:K02805 wecE; dTDP-4-amino-4,6-dideoxygalactose transaminase [EC:2.6.1.59]
16	ko01008 Polyketide biosynthesis proteins (2)	ko:K12240 pchF; pyochelin synthetase
		ko:K15654 srfAA; surfactin family lipopeptide synthetase A
17	ko04131 Membrane trafficking (2)	ko:K06027 NSF; vesicle-fusing ATPase [EC:3.6.4.6]
		ko:K01191 MAN2C1; alpha-mannosidase [EC:3.2.1.24]
18	ko03009 Ribosome biogenesis (2)	ko:K00563 rlmA1; 23S rRNA (guanine745-N1)-methyltransferase [EC:2.1.1.187]
		ko:K12297 rlmL; 23S rRNA (guanine2445-N2)-methyltransferase / 23S rRNA (guanine2069-N7)-methyltransferase [EC:2.1.1.173 2.1.1.264]
19	ko01004 Lipid biosynthesis proteins (1)	ko:K01907 AACS; acetoacetyl-CoA synthetase [EC:6.2.1.16]
20	ko01009 Protein phosphatases and associated proteins (1)	ko:K17570 HYDIN; hydrocephalus-inducing protein
21	ko04812 Cytoskeleton proteins (1)	ko:K06990 MEMO1; MEMO1 family protein
22	ko01011 Peptidoglycan biosynthesis and degradation proteins (1)	ko:K08641 vanX; zinc D-Ala-D-Ala dipeptidase [EC:3.4.13.22]
23	ko03400 DNA repair and recombination proteins (1)	ko:K10843 ERCC3; DNA excision repair protein ERCC-3 [EC:3.6.4.12]
24	ko04147 Exosome (1)	ko:K01724 PCBD; 4a-hydroxytetrahydrobiopterin dehydratase [EC:4.2.1.96]

## Sheet: MODULES
S/N	MODULES	KOs
1	M00176 Assimilatory sulfate reduction, sulfate => H2S (5)	ko:K00392 sir; sulfite reductase (ferredoxin) [EC:1.8.7.1]
		ko:K00955 cysNC; bifunctional enzyme CysN/CysC [EC:2.7.7.4 2.7.1.25]
		ko:K00957 cysD; sulfate adenylyltransferase subunit 2 [EC:2.7.7.4]
		ko:K00958 sat; sulfate adenylyltransferase [EC:2.7.7.4]
2	M00156 Cytochrome c oxidase, cbb3-type (3)	ko:K00404 ccoN; cytochrome c oxidase cbb3-type subunit I [EC:7.1.1.9]
		ko:K00405 ccoO; cytochrome c oxidase cbb3-type subunit II
		ko:K00407 ccoQ; cytochrome c oxidase cbb3-type subunit IV
3	M00546 Purine degradation, xanthine => urea (3)	ko:K11177 yagR; xanthine dehydrogenase YagR molybdenum-binding subunit [EC:1.17.1.4]
		ko:K11178 yagS; xanthine dehydrogenase YagS FAD-binding subunit [EC:1.17.1.4]
		ko:K13483 yagT; xanthine dehydrogenase YagT iron-sulfur-binding subunit
4	M00155 Cytochrome c oxidase, prokaryotes (3)	ko:K02274 coxA; cytochrome c oxidase subunit I [EC:7.1.1.9]
		ko:K02275 coxB; cytochrome c oxidase subunit II [EC:7.1.1.9]
		ko:K02276 coxC; cytochrome c oxidase subunit III [EC:7.1.1.9]
5	M00373 Ethylmalonyl pathway (3)	ko:K00023 phbB; acetoacetyl-CoA reductase [EC:1.1.1.36]
		ko:K01847 MUT; methylmalonyl-CoA mutase [EC:5.4.99.2]
		ko:K01965 PCCA; propionyl-CoA carboxylase alpha chain [EC:6.4.1.3]
6	M00151 Cytochrome bc1 complex respiratory unit (3)	ko:K00411 UQCRFS1; ubiquinol-cytochrome c reductase iron-sulfur subunit [EC:7.1.1.8]
		ko:K00412 CYTB; ubiquinol-cytochrome c reductase cytochrome b subunit
		ko:K00413 CYC1; ubiquinol-cytochrome c reductase cytochrome c1 subunit
7	M00152 Cytochrome bc1 complex (3)	ko:K00411 UQCRFS1; ubiquinol-cytochrome c reductase iron-sulfur subunit [EC:7.1.1.8]
		ko:K00412 CYTB; ubiquinol-cytochrome c reductase cytochrome b subunit
		ko:K00413 CYC1; ubiquinol-cytochrome c reductase cytochrome c1 subunit
8	M00009 Citrate cycle (TCA cycle, Krebs cycle) (2)	ko:K00244 frdA; fumarate reductase flavoprotein subunit [EC:1.3.5.4]
		ko:K18118 aarC; succinyl-CoA:acetate CoA-transferase [EC:2.8.3.18]
9	M00565 Trehalose biosynthesis, D-glucose 1P => trehalose (2)	ko:K01236 treZ; maltooligosyltrehalose trehalohydrolase [EC:3.2.1.141]
		ko:K16149 1,4-alpha-glucan branching enzyme [EC:2.4.1.18]
10	M00011 Citrate cycle, second carbon oxidation, 2-oxoglutarate => oxaloacetate (2)	ko:K00244 frdA; fumarate reductase flavoprotein subunit [EC:1.3.5.4]
		ko:K18118 aarC; succinyl-CoA:acetate CoA-transferase [EC:2.8.3.18]
11	M00925 Cobalamin biosynthesis, aerobic, uroporphyrinogen III => precorrin 2 => cobyrinate a,c-diamide (2)	ko:K02230 cobN; cobaltochelatase CobN [EC:6.6.1.2]
		ko:K09883 cobT; cobaltochelatase CobT [EC:6.6.1.2]
12	M00741 Propanoyl-CoA metabolism, propanoyl-CoA => succinyl-CoA (2)	ko:K01847 MUT; methylmalonyl-CoA mutase [EC:5.4.99.2]
		ko:K01965 PCCA; propionyl-CoA carboxylase alpha chain [EC:6.4.1.3]
13	M00165 Reductive pentose phosphate cycle (Calvin cycle) (2)	ko:K11532 glpX-SEBP; fructose-1,6-bisphosphatase II / sedoheptulose-1,7-bisphosphatase [EC:3.1.3.11 3.1.3.37]
14	M00167 Reductive pentose phosphate cycle, glyceraldehyde-3P => ribulose-5P (2)	ko:K11532 glpX-SEBP; fructose-1,6-bisphosphatase II / sedoheptulose-1,7-bisphosphatase [EC:3.1.3.11 3.1.3.37]
15	M00376 3-Hydroxypropionate bi-cycle (2)	ko:K01847 MUT; methylmalonyl-CoA mutase [EC:5.4.99.2]
		ko:K01962 accA; acetyl-CoA carboxylase carboxyl transferase subunit alpha [EC:6.4.1.2 2.1.3.15]
16	M00154 Cytochrome c oxidase (2)	ko:K02258 COX11; cytochrome c oxidase assembly protein subunit 11
		ko:K02259 COX15; heme a synthase [EC:1.17.99.9]
17	M00024 Phenylalanine biosynthesis, chorismate => phenylpyruvate => phenylalanine (1)	ko:K04093 pheA1; chorismate mutase [EC:5.4.99.5]
18	M00377 Reductive acetyl-CoA pathway (Wood-Ljungdahl pathway) (1)	ko:K15022 fdhB; formate dehydrogenase (NADP+) beta subunit [EC:1.17.1.10]
19	M00026 Histidine biosynthesis, PRPP => histidine (1)	ko:K05602 hisN; histidinol-phosphatase [EC:3.1.3.15]
20	M00736 Nocardicin A biosynthesis, L-pHPG + arginine + serine => nocardicin A (1)	ko:K05375 mbtH; MbtH protein
21	M00003 Gluconeogenesis, oxaloacetate => fructose-6P (1)	ko:K11532 glpX-SEBP; fructose-1,6-bisphosphatase II / sedoheptulose-1,7-bisphosphatase [EC:3.1.3.11 3.1.3.37]
22	M00088 Ketone body biosynthesis, acetyl-CoA => acetoacetate/3-hydroxybutyrate/acetone (1)	ko:K01574 adc; acetoacetate decarboxylase [EC:4.1.1.4]
23	M00082 Fatty acid biosynthesis, initiation (1)	ko:K01962 accA; acetyl-CoA carboxylase carboxyl transferase subunit alpha [EC:6.4.1.2 2.1.3.15]
24	M00121 Heme biosynthesis, plants and bacteria, glutamate => heme (1)	ko:K08973 hemJ; protoporphyrinogen IX oxidase [EC:1.3.99.-]
25	M00575 Pertussis pathogenicity signature, T1SS (1)	ko:K11004 hlyB; ATP-binding cassette, subfamily B, bacterial HlyB/CyaB
26	M00651 Vancomycin resistance, D-Ala-D-Lac type (1)	ko:K08641 vanX; zinc D-Ala-D-Ala dipeptidase [EC:3.4.13.22]
27	M00001 Glycolysis (Embden-Meyerhof pathway), glucose => pyruvate (1)	ko:K16306 fructose-bisphosphate aldolase / 2-amino-3
28	M00047 Creatine pathway (1)	ko:K00613 GATM; glycine amidinotransferase [EC:2.1.4.1]
29	M00173 Reductive citrate cycle (Arnon-Buchanan cycle) (1)	ko:K00244 frdA; fumarate reductase flavoprotein subunit [EC:1.3.5.4]
30	M00851 Carbapenem resistance (1)	ko:K18970 blaGES; beta-lactamase class A GES [EC:3.5.2.6]
31	M00345 Formaldehyde assimilation, ribulose monophosphate pathway (1)	ko:K08094 hxlB; 6-phospho-3-hexuloisomerase [EC:5.3.1.27]
32	M00525 Lysine biosynthesis, acetyl-DAP pathway, aspartate => lysine (1)	ko:K05822 dapH; tetrahydrodipicolinate N-acetyltransferase [EC:2.3.1.89]
33	M00045 Histidine degradation, histidine => N-formiminoglutamate => glutamate (1)	ko:K05603 hutF; formimidoylglutamate deiminase [EC:3.5.3.13]
34	M00627 beta-Lactam resistance, Bla system (1)	ko:K17836 penP; beta-lactamase class A [EC:3.5.2.6]
35	M00868 Heme biosynthesis, animals and fungi, glycine => heme (1)	ko:K00643 E2.3.1.37; 5-aminolevulinate synthase [EC:2.3.1.37]
36	M00854 Glycogen biosynthesis, glucose-1P => glycogen/starch (1)	ko:K16149 1,4-alpha-glucan branching enzyme [EC:2.4.1.18]
37	M00787 Bacilysin biosynthesis, prephenate => bacilysin (1)	ko:K19548 bacC; dihydroanticapsin dehydrogenase [EC:1.1.1.385]
38	M00119 Pantothenate biosynthesis, valine/L-aspartate => pantothenate (1)	ko:K01579 panD; aspartate 1-decarboxylase [EC:4.1.1.11]
39	M00036 Leucine degradation, leucine => acetoacetate + acetyl-CoA (1)	ko:K01969 E6.4.1.4B; 3-methylcrotonyl-CoA carboxylase beta subunit [EC:6.4.1.4]
40	M00034 Methionine salvage pathway (1)	ko:K08965 mtnW; 2,3-diketo-5-methylthiopentyl-1-phosphate enolase [EC:5.3.2.5]
41	M00072 N-glycosylation by oligosaccharyltransferase (1)	ko:K07151 STT3; dolichyl-diphosphooligosaccharide---protein glycosyltransferase [EC:2.4.99.18]
42	M00150 Fumarate reductase, prokaryotes (1)	ko:K00244 frdA; fumarate reductase flavoprotein subunit [EC:1.3.5.4]
43	M00025 Tyrosine biosynthesis, chorismate => HPP => tyrosine (1)	ko:K04093 pheA1; chorismate mutase [EC:5.4.99.5]
44	M00570 Isoleucine biosynthesis, threonine => 2-oxobutanoate => isoleucine (1)	ko:K17989 SDS; L-serine/L-threonine ammonia-lyase [EC:4.3.1.17 4.3.1.19]
45	M00580 Pentose phosphate pathway, archaea, fructose 6P => ribose 5P (1)	ko:K08094 hxlB; 6-phospho-3-hexuloisomerase [EC:5.3.1.27]
46	M00905 Grixazone biosynthesis, aspartate 4-semialdehyde => grixazone B (1)	ko:K17835 griH; 3-amino-4-hydroxybenzoic acid synthase [EC:4.1.99.20]
47	M00040 Tyrosine biosynthesis, chorismate => arogenate => tyrosine (1)	ko:K00220 tyrC; cyclohexadieny/prephenate dehydrogenase [EC:1.3.1.43 1.3.1.12]
48	M00596 Dissimilatory sulfate reduction, sulfate => H2S (1)	ko:K00958 sat; sulfate adenylyltransferase [EC:2.7.7.4]
49	M00358 Coenzyme M biosynthesis (1)	ko:K08097 comA; phosphosulfolactate synthase [EC:4.4.1.19]

## Sheet: RAW_DATA_KOs
S/N	KOs	baseMean	log2FoldChange	lfcSE	stat	pvalue	padj	Descriptions
1	K00392	236.491	-6.36449	0.841804	-7.56053	2.31942e-09	1.27777e-05	K00392 sir; sulfite reductase (ferredoxin) [EC:1.8.7.1]
2	K10353	69.3841	5.95375	0.85181	6.98953	1.50448e-08	4.14408e-05	K10353 E2.7.1.76, dak; deoxyadenosine kinase [EC:2.7.1.76]
3	K16422	33.9716	5.1153	0.821319	6.22815	1.86494e-07	0.000299885	K16422 hmo, nocN; 4-hydroxymandelate oxidase [EC:1.1.3.46]
4	K02274	122.52	-4.54952	0.736001	-6.18141	2.17742e-07	0.000299885	K02274 coxA, ctaD; cytochrome c oxidase subunit I [EC:7.1.1.9]
5	K01724	98.7903	-5.51167	0.924705	-5.96047	4.52769e-07	0.000359663	K01724 PCBD, phhB; 4a-hydroxytetrahydrobiopterin dehydratase [EC:4.2.1.96]
6	K02482	162.812	-5.43992	0.92672	-5.87008	6.10724e-07	0.000359663	K02482 flgS; two-component system, NtrC family, sensor kinase [EC:2.7.13.3]
7	K02276	115.785	-4.67713	0.796942	-5.86885	6.13218e-07	0.000359663	K02276 coxC, ctaE; cytochrome c oxidase subunit III [EC:7.1.1.9]
8	K16885	83.9809	-5.52925	0.945184	-5.84992	6.52864e-07	0.000359663	K16885 qmoA; quinone-modifying oxidoreductase, subunit QmoA
9	K16886	83.9809	-5.52925	0.945184	-5.84992	6.52864e-07	0.000359663	K16886 qmoB; quinone-modifying oxidoreductase, subunit QmoB
10	K16887	83.9809	-5.52925	0.945184	-5.84992	6.52864e-07	0.000359663	K16887 qmoC; quinone-modifying oxidoreductase, subunit QmoC
11	K08973	93.9025	-5.64833	0.972956	-5.80533	7.5663e-07	0.000378934	K08973 hemJ; protoporphyrinogen IX oxidase [EC:1.3.99.-]
12	K19508	9988.18	-1.90347	0.330734	-5.75529	8.92797e-07	0.00038005	K19508 gfrC; fructoselysine/glucoselysine PTS system EIIC component
13	K00958	89.427	-4.78738	0.849173	-5.63769	1.31665e-06	0.000518104	K00958 sat, met3; sulfate adenylyltransferase [EC:2.7.7.4]
14	K03197	77.3025	-5.26265	0.945538	-5.56577	1.66921e-06	0.000571526	K03197 virB2, lvhB2; type IV secretion system protein VirB2
15	K07722	5927.33	-1.70933	0.3077	-5.5552	1.72839e-06	0.000571526	K07722 nikR; CopG family transcriptional regulator, nickel-responsive regulator
16	K07067	6004.83	-2.09596	0.378823	-5.53282	1.86069e-06	0.000571526	K07067 disA; diadenylate cyclase [EC:2.7.7.85]
17	K03198	77.1816	-5.25503	0.951559	-5.52255	1.92473e-06	0.000571526	K03198 virB3, lvhB3; type IV secretion system protein VirB3
18	K07151	77.4035	-5.25739	0.954897	-5.50571	2.03449e-06	0.000571526	K07151 STT3; dolichyl-diphosphooligosaccharide---protein glycosyltransferase [EC:2.4.99.18]
19	K19713	77.5648	-5.23049	0.951043	-5.49974	2.07488e-06	0.000571526	K19713 tsdA; thiosulfate dehydrogenase [EC:1.8.2.2]
20	K02275	185.599	-4.21079	0.768864	-5.47664	2.23887e-06	0.000587331	K02275 coxB, ctaC; cytochrome c oxidase subunit II [EC:7.1.1.9]
21	K03852	76.9594	-5.25119	0.963037	-5.45274	2.42203e-06	0.000606497	K03852 xsc; sulfoacetaldehyde acetyltransferase [EC:2.3.3.15]
22	K11912	77.1648	-5.2118	0.963437	-5.40959	2.79125e-06	0.000668565	K11912 ppkA; serine/threonine-protein kinase PpkA [EC:2.7.11.1]
23	K02082	6789.25	-1.6002	0.298415	-5.36232	3.26017e-06	0.000748344	K02082 agaS; tagatose-6-phosphate ketose/aldose isomerase [EC:5.-.-.-]
24	K10764	86.735	-5.34915	1.00855	-5.30381	3.94997e-06	0.000870416	K10764 metZ; O-succinylhomoserine sulfhydrylase [EC:2.5.1.-]
25	K00154	36.2237	4.13063	0.781405	5.28616	4.18523e-06	0.000886785	K00154 E1.2.1.68; coniferyl-aldehyde dehydrogenase [EC:1.2.1.68]
26	K02538	39.4007	4.14175	0.789704	5.24469	4.79406e-06	0.000978166	K02538 manR; activator of the mannose operon, transcriptional antiterminator
27	K01478	7266.41	-1.57649	0.303661	-5.19163	5.70236e-06	0.00112194	K01478 arcA; arginine deiminase [EC:3.5.3.6]
28	K07717	327.821	4.12645	0.799144	5.16359	6.24944e-06	0.00118718	K07717 ycbA, glnK; two-component system, sensor histidine kinase YcbA [EC:2.7.13.3]
29	K09689	38.3396	4.26443	0.849404	5.0205	9.95997e-06	0.00165647	K09689 kpsT; capsular polysaccharide transport system ATP-binding protein [EC:7.6.2.12]
30	K02279	5033.51	-1.80934	0.361285	-5.00806	1.03706e-05	0.00165647	K02279 cpaB, rcpC; pilus assembly protein CpaB
31	K14086	4050.37	-2.3182	0.463272	-5.00397	1.05094e-05	0.00165647	K14086 echA; ech hydrogenase subunit A
32	K00220	32.5788	-4.96176	0.994321	-4.9901	1.09933e-05	0.00165647	K00220 tyrC; cyclohexadieny/prephenate dehydrogenase [EC:1.3.1.43 1.3.1.12]
33	K07266	38.2976	4.26105	0.854267	4.98796	1.107e-05	0.00165647	K07266 kpsC, lipA; capsular polysaccharide export protein
34	K01768	895.117	-2.61041	0.523708	-4.98447	1.1196e-05	0.00165647	K01768 E4.6.1.1; adenylate cyclase [EC:4.6.1.1]
35	K14090	4040.48	-2.31048	0.463676	-4.98295	1.12512e-05	0.00165647	K14090 echE; ech hydrogenase subunit E
36	K10107	38.3896	4.21326	0.846742	4.97585	1.15137e-05	0.00165647	K10107 kpsE; capsular polysaccharide transport system permease protein
37	K19507	6320.16	-1.67716	0.337251	-4.97302	1.16195e-05	0.00165647	K19507 gfrB; fructoselysine/glucoselysine PTS system EIIB component [EC:2.7.1.-]
38	K07265	38.1089	4.24535	0.859034	4.94201	1.28483e-05	0.00165647	K07265 kpsS, lipB; capsular polysaccharide export protein
39	K07157	37.7898	-4.3499	0.880406	-4.94079	1.28991e-05	0.00165647	K07157 K07157; uncharacterized protein
40	K07064	7.58525	-3.72643	0.754734	-4.93741	1.30412e-05	0.00165647	K07064 K07064; uncharacterized protein
41	K10851	14.1743	3.6143	0.732377	4.93503	1.31422e-05	0.00165647	K10851 nreA; nitrogen regulatory protein A
42	K09688	38.4916	4.19784	0.856447	4.90146	1.46501e-05	0.00165647	K09688 kpsM; capsular polysaccharide transport system permease protein
43	K19506	6015.92	-1.83355	0.37473	-4.89298	1.50573e-05	0.00165647	K19506 gfrA; fructoselysine/glucoselysine PTS system EIIA component [EC:2.7.1.-]
44	K07704	5199.95	-1.42249	0.29096	-4.88895	1.52549e-05	0.00165647	K07704 lytS; two-component system, LytTR family, sensor histidine kinase LytS [EC:2.7.13.3]
45	K06886	803.832	-3.24041	0.663311	-4.88521	1.54407e-05	0.00165647	K06886 glbN; hemoglobin
46	K06157	48.0057	4.0683	0.833209	4.88269	1.55667e-05	0.00165647	K06157 idnT; Gnt-II system L-idonate transporter
47	K13061	48.085	4.06309	0.833381	4.87543	1.59363e-05	0.00165647	K13061 rhlI, phzI, solI, cepI, tofI; acyl homoserine lactone synthase [EC:2.3.1.184]
48	K16696	48.085	4.06309	0.833381	4.87543	1.59363e-05	0.00165647	K16696 amsL; exopolysaccharide (amylovoran) exporter
49	K16700	48.085	4.06309	0.833381	4.87543	1.59363e-05	0.00165647	K16700 amsB; amylovoran biosynthesis glycosyltransferase AmsB [EC:2.4.-.-]
50	K16707	48.085	4.06309	0.833381	4.87543	1.59363e-05	0.00165647	K16707 amsG; UDP-galactose-lipid carrier transferase
51	K16708	48.085	4.06309	0.833381	4.87543	1.59363e-05	0.00165647	K16708 amsC; amylovoran biosynthesis protein AmsC
52	K17989	48.085	4.06309	0.833381	4.87543	1.59363e-05	0.00165647	K17989 SDS, SDH, CHA1; L-serine/L-threonine ammonia-lyase [EC:4.3.1.17 4.3.1.19]
53	K17228	34.7228	4.12455	0.84882	4.85916	1.67958e-05	0.00170278	K17228 sfnG; dimethylsulfone monooxygenase [EC:1.14.14.35]
54	K07577	26.7739	-4.77165	0.982748	-4.85542	1.7e-05	0.00170278	K07577 K07577; putative mRNA 3-end processing factor
55	K02280	57.8343	-4.80893	0.99543	-4.83101	1.83927e-05	0.00180938	K02280 cpaC, rcpA; pilus assembly protein CpaC
56	K01120	9.59541	3.90713	0.811038	4.81744	1.92147e-05	0.00185708	K01120 cpdP; 3',5'-cyclic-nucleotide phosphodiesterase [EC:3.1.4.17]
57	K13950	744.691	-4.31762	0.898928	-4.80308	2.01245e-05	0.00191148	K13950 pabAB; para-aminobenzoate synthetase [EC:2.6.1.85]
58	K17074	10155.9	-1.45152	0.302941	-4.79144	2.08931e-05	0.00195085	K17074 lysX2; putative lysine transport system permease protein
59	K13693	48.5135	3.86117	0.808744	4.77429	2.20783e-05	0.00202716	K13693 gpgS; glucosyl-3-phosphoglycerate synthase [EC:2.4.1.266]
60	K00404	30.9861	-4.31471	0.907874	-4.75255	2.36763e-05	0.00208579	K00404 ccoN; cytochrome c oxidase cbb3-type subunit I [EC:7.1.1.9]
61	K00405	30.9861	-4.31471	0.907874	-4.75255	2.36763e-05	0.00208579	K00405 ccoO; cytochrome c oxidase cbb3-type subunit II
62	K05822	4696.15	-1.701	0.358088	-4.75023	2.38527e-05	0.00208579	K05822 dapH, dapD; tetrahydrodipicolinate N-acetyltransferase [EC:2.3.1.89]
63	K01023	4318.28	-3.69458	0.789284	-4.68092	2.97894e-05	0.00256422	K01023 assT; arylsulfate sulfotransferase [EC:2.8.2.22]
64	K00413	35.5391	-4.2746	0.915693	-4.66816	3.10306e-05	0.00262997	K00413 CYC1, CYT1, petC; ubiquinol-cytochrome c reductase cytochrome c1 subunit
65	K07739	4176.98	-2.14366	0.460733	-4.65271	3.26023e-05	0.00268288	K07739 ELP3, KAT9; elongator complex protein 3 [EC:2.3.1.48]
66	K19548	7.76138	2.98336	0.641834	4.64818	3.30775e-05	0.00268288	K19548 bacC; dihydroanticapsin dehydrogenase [EC:1.1.1.385]
67	K01569	48.8781	3.72426	0.801291	4.64782	3.31159e-05	0.00268288	K01569 oxdD; oxalate decarboxylase [EC:4.1.1.2]
68	K04757	6246.76	-1.63927	0.354404	-4.62543	3.55708e-05	0.00283999	K04757 rsbW; serine/threonine-protein kinase RsbW [EC:2.7.11.1]
69	K15518	1317.95	-3.55707	0.771871	-4.60837	3.75604e-05	0.00290313	K15518 dgk; deoxyguanosine kinase [EC:2.7.1.113]
70	K15519	1317.95	-3.55707	0.771871	-4.60837	3.75604e-05	0.00290313	K15519 dck; deoxyadenosine/deoxycytidine kinase [EC:2.7.1.76 2.7.1.74]
71	K08159	5233.92	-1.76322	0.382985	-4.60389	3.81008e-05	0.00290313	K08159 sotB; MFS transporter, DHA1 family, L-arabinose/isopropyl-beta-D-thiogalactopyranoside export protein
72	K17073	5414.17	-1.66162	0.361154	-4.60086	3.84696e-05	0.00290313	K17073 lysX1; putative lysine transport system substrate-binding protein
73	K09711	1308.05	-3.54553	0.776929	-4.56352	4.33262e-05	0.00319972	K09711 lipS1; lipoyl synthase
74	K05602	54.6455	-2.93975	0.645184	-4.55645	4.43115e-05	0.00319972	K05602 hisN; histidinol-phosphatase [EC:3.1.3.15]
75	K03090	5497.45	-1.65035	0.362481	-4.55294	4.48089e-05	0.00319972	K03090 sigB; RNA polymerase sigma-B factor
76	K18588	33.4442	-4.41289	0.971818	-4.54086	4.65625e-05	0.00319972	K18588 COQ10; coenzyme Q-binding protein COQ10
77	K01578	27.3979	-4.24479	0.935331	-4.53827	4.69463e-05	0.00319972	K01578 MLYCD; malonyl-CoA decarboxylase [EC:4.1.1.9]
78	K08097	13.3022	-3.8351	0.845639	-4.53516	4.74136e-05	0.00319972	K08097 comA; phosphosulfolactate synthase [EC:4.4.1.19]
79	K02592	10.1828	-3.93108	0.868072	-4.52851	4.84241e-05	0.00319972	K02592 nifN; nitrogenase molybdenum-iron protein NifN
80	K00643	32.2012	-4.39862	0.971705	-4.52671	4.87027e-05	0.00319972	K00643 E2.3.1.37, ALAS; 5-aminolevulinate synthase [EC:2.3.1.37]
81	K13583	32.2012	-4.39862	0.971705	-4.52671	4.87027e-05	0.00319972	K13583 gcrA; GcrA cell cycle regulator
82	K00510	380.983	-3.95446	0.874674	-4.52107	4.95815e-05	0.00319972	K00510 HMOX1; heme oxygenase 1 [EC:1.14.14.18]
83	K09883	32.1762	-4.3964	0.973712	-4.51509	5.0531e-05	0.00319972	K09883 cobT; cobaltochelatase CobT [EC:6.6.1.2]
84	K09985	32.1762	-4.3964	0.973712	-4.51509	5.0531e-05	0.00319972	K09985 K09985; uncharacterized protein
85	K09987	32.1762	-4.3964	0.973712	-4.51509	5.0531e-05	0.00319972	K09987 K09987; uncharacterized protein
86	K11532	32.1762	-4.3964	0.973712	-4.51509	5.0531e-05	0.00319972	K11532 glpX-SEBP; fructose-1,6-bisphosphatase II / sedoheptulose-1,7-bisphosphatase [EC:3.1.3.11 3.1.3.37]
87	K07028	28.303	-4.12234	0.915896	-4.50089	5.28582e-05	0.00325371	K07028 K07028; uncharacterized protein
88	K03813	859.755	-2.55964	0.568759	-4.50039	5.29413e-05	0.00325371	K03813 modD; molybdenum transport protein [EC:2.4.2.-]
89	K02258	33.073	-4.29132	0.954721	-4.49484	5.38803e-05	0.00325371	K02258 COX11, ctaG; cytochrome c oxidase assembly protein subunit 11
90	K07160	8469.54	1.39806	0.311036	4.49484	5.38811e-05	0.00325371	K07160 pxpA; 5-oxoprolinase (ATP-hydrolysing) subunit A [EC:3.5.2.9]
91	K18587	32.1512	-4.39261	0.97825	-4.49027	5.46657e-05	0.00325371	K18587 COQ9; ubiquinone biosynthesis protein COQ9
92	K09991	32.1342	-4.38424	0.977885	-4.48339	5.58695e-05	0.00325371	K09991 K09991; uncharacterized protein
93	K17324	26.3016	-4.24653	0.947454	-4.48204	5.61086e-05	0.00325371	K17324 glpS; glycerol transport system ATP-binding protein
94	K17325	26.3016	-4.24653	0.947454	-4.48204	5.61086e-05	0.00325371	K17325 K17325, glpT; glycerol transport system ATP-binding protein
95	K08982	31.0959	-3.39153	0.758562	-4.471	5.81039e-05	0.00330681	K08982 K08982; putative membrane protein
96	K15011	27.1051	-4.23793	0.948698	-4.4671	5.8825e-05	0.00330681	K15011 regB, regS, actS; two-component system, sensor histidine kinase RegB [EC:2.7.13.3]
97	K15012	27.1051	-4.23793	0.948698	-4.4671	5.8825e-05	0.00330681	K15012 regA, regR, actR; two-component system, response regulator RegA
98	K02747	6077.98	-1.37443	0.309917	-4.43485	6.5134e-05	0.00362447	K02747 agaE; N-acetylgalactosamine PTS system EIID component
99	K11004	51.3314	4.22005	0.952993	4.42821	6.65139e-05	0.00366425	K11004 hlyB, cyaB; ATP-binding cassette, subfamily B, bacterial HlyB/CyaB
100	K02745	5828.54	-1.36742	0.309699	-4.41533	6.92716e-05	0.00377839	K02745 agaV; N-acetylgalactosamine PTS system EIIB component [EC:2.7.1.-]
101	K05603	48.7378	3.60712	0.819046	4.40405	7.17777e-05	0.00380136	K05603 hutF; formimidoylglutamate deiminase [EC:3.5.3.13]
102	K05660	51.2992	4.22391	0.960323	4.39843	7.30588e-05	0.00380136	K05660 ABCB5; ATP-binding cassette, subfamily B (MDR/TAP), member 5
103	K16016	51.2992	4.22391	0.960323	4.39843	7.30588e-05	0.00380136	K16016 rifK, asm24, asm43; 3-amino-5-hydroxybenzoate synthase [EC:4.2.1.144 2.6.1.-]
104	K01965	33.6198	-4.02	0.91404	-4.39806	7.31429e-05	0.00380136	K01965 PCCA, pccA; propionyl-CoA carboxylase alpha chain [EC:6.4.1.3]
105	K07061	6.40892	2.5362	0.578149	4.38676	7.57928e-05	0.00390227	K07061 cmr1; CRISPR-associated protein Cmr1
106	K02746	6236.63	-1.3234	0.302802	-4.37053	7.97609e-05	0.00406854	K02746 agaW; N-acetylgalactosamine PTS system EIIC component
107	K00407	30.5559	-3.91898	0.898033	-4.36396	8.14244e-05	0.00411529	K00407 ccoQ; cytochrome c oxidase cbb3-type subunit IV
108	K01236	24.5722	-3.11307	0.716945	-4.34213	8.71994e-05	0.00435087	K01236 treZ, glgZ; maltooligosyltrehalose trehalohydrolase [EC:3.2.1.141]
109	K01574	371.93	-4.14326	0.954745	-4.33965	8.78797e-05	0.00435087	K01574 adc; acetoacetate decarboxylase [EC:4.1.1.4]
110	K07234	30.2052	-3.9406	0.90877	-4.33619	8.88388e-05	0.00435087	K07234 K07234; uncharacterized protein involved in response to NO
111	K05564	370.514	-4.06141	0.937786	-4.33085	9.03396e-05	0.00435087	K05564 phaG; multicomponent K+:H+ antiporter subunit G
112	K18480	28.6917	-3.94198	0.910377	-4.33006	9.05634e-05	0.00435087	K18480 linN; cholesterol transport system auxiliary component
113	K01847	15861.4	1.35848	0.313799	4.32914	9.0824e-05	0.00435087	K01847 MUT; methylmalonyl-CoA mutase [EC:5.4.99.2]
114	K05973	28.2286	-3.98975	0.92526	-4.31203	9.58246e-05	0.00455084	K05973 phaZ; poly(3-hydroxybutyrate) depolymerase [EC:3.1.1.75]
115	K01732	101.2	-4.48028	1.04283	-4.29625	0.000100671	0.00474016	K01732 E4.2.2.10; pectin lyase [EC:4.2.2.10]
116	K01444	1965.15	-2.39161	0.5584	-4.28297	0.00010494	0.00486477	K01444 AGA, aspG; N4-(beta-N-acetylglucosaminyl)-L-asparaginase [EC:3.5.1.26]
117	K12297	5431.87	-1.53113	0.357529	-4.28253	0.000105084	0.00486477	K12297 rlmL, rlmK; 23S rRNA (guanine2445-N2)-methyltransferase / 23S rRNA (guanine2069-N7)-methyltransferase [EC:2.1.1.173 2.1.1.264]
118	K17570	367.526	-4.1309	0.965636	-4.2779	0.000106612	0.00489439	K17570 HYDIN; hydrocephalus-inducing protein
119	K12070	8.23731	3.09533	0.72678	4.25896	0.000113104	0.00493097	K12070 traI; conjugal transfer pilus assembly protein TraI
120	K18792	8.23731	3.09533	0.72678	4.25896	0.000113104	0.00493097	K18792 blaOXA-10; beta-lactamase class D OXA-10 [EC:3.5.2.6]
121	K18923	8.23731	3.09533	0.72678	4.25896	0.000113104	0.00493097	K18923 stbD; antitoxin StbD
122	K18970	8.23731	3.09533	0.72678	4.25896	0.000113104	0.00493097	K18970 blaGES; beta-lactamase class A GES [EC:3.5.2.6]
123	K19100	8.23731	3.09533	0.72678	4.25896	0.000113104	0.00493097	K19100 blaDHA; beta-lactamase class C DHA [EC:3.5.2.6]
124	K19301	8.23731	3.09533	0.72678	4.25896	0.000113104	0.00493097	K19301 aac6-II; aminoglycoside 6'-N-acetyltransferase II [EC:2.3.1.82]
125	K03492	5642.8	-1.83073	0.430017	-4.25735	0.000113675	0.00493097	K03492 ydhQ; GntR family transcriptional regulator
126	K09126	8.91395	-3.48088	0.818707	-4.25168	0.000115701	0.00497968	K09126 K09126; uncharacterized protein
127	K06436	2248.95	-2.64403	0.62293	-4.24451	0.000118314	0.00505266	K06436 yabG; spore coat assemly protein
128	K01042	7626.68	-1.01677	0.240691	-4.22438	0.000125967	0.00530071	K01042 selA; L-seryl-tRNA(Ser) seleniumtransferase [EC:2.9.1.1]
129	K06976	2797.04	-2.66312	0.630447	-4.22417	0.000126047	0.00530071	K06976 K06976; uncharacterized protein
130	K00563	12326.1	-1.10458	0.26178	-4.21951	0.000127889	0.00533742	K00563 rlmA1; 23S rRNA (guanine745-N1)-methyltransferase [EC:2.1.1.187]
131	K01644	5781.02	1.43063	0.339509	4.21383	0.000130165	0.00539156	K01644 citE; citrate lyase subunit beta / citryl-CoA lyase [EC:4.1.3.34]
132	K09931	4.16303	2.65628	0.631063	4.20922	0.000132045	0.00539847	K09931 K09931; uncharacterized protein
133	K11060	368.557	-4.06196	0.965154	-4.20862	0.000132291	0.00539847	K11060 entB; probable enterotoxin B
134	K01299	6410.15	-1.36387	0.324521	-4.20274	0.00013473	0.00542657	K01299 E3.4.17.19; carboxypeptidase Taq [EC:3.4.17.19]
135	K16870	27.8788	-2.68677	0.639371	-4.20221	0.00013495	0.00542657	K16870 wbbL; N-acetylglucosaminyl-diphospho-decaprenol L-rhamnosyltransferase [EC:2.4.1.289]
136	K18917	6.61983	-2.44015	0.581797	-4.19417	0.000138363	0.00552347	K18917 mrx1; mycoredoxin [EC:1.20.4.3]
137	K15924	250.313	-4.05878	0.971011	-4.17996	0.000144597	0.00568725	K15924 xynC; glucuronoarabinoxylan endo-1,4-beta-xylanase [EC:3.2.1.136]
138	K02573	3340.4	-1.58075	0.378214	-4.17952	0.000144793	0.00568725	K02573 napG; ferredoxin-type protein NapG
139	K18824	9.41014	3.06951	0.734719	4.17781	0.000145562	0.00568725	K18824 sul2; dihydropteroate synthase type 2 [EC:2.5.1.15]
140	K17316	17.1889	-2.71377	0.650129	-4.1742	0.000147199	0.00571069	K17316 gtsB, glcF; glucose/mannose transport system permease protein
141	K02259	51.6189	-3.09908	0.74369	-4.16717	0.000150439	0.00575262	K02259 COX15, ctaA; heme a synthase [EC:1.17.99.9]
142	K00955	37.226	-3.68853	0.885356	-4.16615	0.000150916	0.00575262	K00955 cysNC; bifunctional enzyme CysN/CysC [EC:2.7.7.4 2.7.1.25]
143	K13252	3572.3	-1.90997	0.458733	-4.16358	0.000152122	0.00575262	K13252 ptcA; putrescine carbamoyltransferase [EC:2.1.3.6]
144	K09764	2508.2	-1.99891	0.480364	-4.16125	0.000153224	0.00575262	K09764 K09764; uncharacterized protein
145	K02234	27.7486	-3.96388	0.953032	-4.15923	0.000154183	0.00575262	K02234 cobW; cobalamin biosynthesis protein CobW
146	K13057	16.1263	-2.76954	0.666	-4.15847	0.000154545	0.00575262	K13057 treT; trehalose synthase [EC:2.4.1.245]
147	K17317	16.9879	-2.69611	0.64871	-4.15612	0.000155676	0.00575582	K17317 gtsC, glcG; glucose/mannose transport system permease protein
148	K17363	6323	-2.57077	0.619763	-4.14799	0.00015964	0.00582698	K17363 urdA; urocanate reductase [EC:1.3.99.33]
149	K14998	33.5947	-3.88708	0.937415	-4.1466	0.000160326	0.00582698	K14998 SURF1, SHY1; surfeit locus 1 family protein
150	K06990	429.734	-3.88478	0.937133	-4.14539	0.000160928	0.00582698	K06990 MEMO1; MEMO1 family protein
151	K05375	38.1463	3.44563	0.831559	4.14358	0.000161831	0.00582698	K05375 mbtH, nocI; MbtH protein
152	K13820	1627.79	-3.01399	0.727795	-4.14127	0.000162991	0.00583064	K13820 fliR-flhB; flagellar biosynthesis protein FliR/FlhB
153	K03309	1111.89	-2.16716	0.525436	-4.1245	0.000171651	0.00610082	K03309 TC.DAACS; dicarboxylate/amino acid:cation (Na+ or H+) symporter, DAACS family
154	K14088	3457.3	-1.97424	0.478908	-4.12238	0.000172782	0.00610163	K14088 echC; ech hydrogenase subunit C
155	K01643	5553.54	1.41255	0.343631	4.11065	0.000179146	0.00628609	K01643 citF; citrate lyase subunit alpha / citrate CoA-transferase [EC:2.8.3.10]
156	K01727	231.938	3.54746	0.864182	4.10499	0.000182297	0.00632668	K01727 hysA, hylA, hylB; hyaluronate lyase [EC:4.2.2.1]
157	K00298	106.142	4.02259	0.980211	4.1038	0.000182968	0.00632668	K00298 ceo; N5-(carboxyethyl)ornithine synthase [EC:1.5.1.24]
158	K07307	6157.08	-1.46403	0.357026	-4.10061	0.000184771	0.00632668	K07307 dmsB; anaerobic dimethyl sulfoxide reductase subunit B
159	K11016	20.0481	3.39236	0.827324	4.10039	0.000184897	0.00632668	K11016 shlA, hhdA, hpmA; hemolysin
160	K18661	27.9713	-3.77155	0.923992	-4.0818	0.000195786	0.00665792	K18661 matB; malonyl-CoA/methylmalonyl-CoA synthetase [EC:6.2.1.-]
161	K09947	26.68	-3.82815	0.938549	-4.0788	0.000197602	0.00667847	K09947 K09947; uncharacterized protein
162	K10039	5293.45	-1.19134	0.292539	-4.0724	0.000201525	0.00676951	K10039 peb1A, glnH; aspartate/glutamate/glutamine transport system substrate-binding protein
163	K07684	3990.72	-1.78919	0.440278	-4.06378	0.000206936	0.00690917	K07684 narL; two-component system, NarL family, nitrate/nitrite response regulator NarL
164	K10843	17.8944	-2.69853	0.667011	-4.0457	0.000218741	0.00721608	K10843 ERCC3, XPB; DNA excision repair protein ERCC-3 [EC:3.6.4.12]
165	K13275	1350.17	-2.86282	0.707624	-4.04569	0.000218749	0.00721608	K13275 isp; major intracellular serine protease [EC:3.4.21.-]
166	K10040	8758.35	-1.44488	0.357788	-4.03838	0.000223706	0.00731454	K10040 peb1B, glnP, glnM; aspartate/glutamate/glutamine transport system permease protein
167	K00992	623.482	-2.74869	0.68081	-4.03738	0.000224389	0.00731454	K00992 murU; N-acetyl-alpha-D-muramate 1-phosphate uridylyltransferase [EC:2.7.7.99]
168	K18589	11.1231	3.03354	0.751849	4.03478	0.000226184	0.0073297	K18589 dfrA1, dhfr; dihydrofolate reductase (trimethoprim resistance protein) [EC:1.5.1.3]
169	K13927	3423.07	2.08968	0.518944	4.02679	0.000231783	0.00743273	K13927 citXG; holo-ACP synthase / triphosphoribosyl-dephospho-CoA synthase [EC:2.7.7.61 2.4.2.52]
170	K01907	38.4353	-3.49958	0.869305	-4.02572	0.000232548	0.00743273	K01907 AACS, acsA; acetoacetyl-CoA synthetase [EC:6.2.1.16]
171	K01191	9716.64	1.60101	0.397816	4.02451	0.000233411	0.00743273	K01191 MAN2C1; alpha-mannosidase [EC:3.2.1.24]
172	K00901	18106	-0.982165	0.244529	-4.01656	0.000239158	0.00752802	K00901 dgkA, DGK; diacylglycerol kinase (ATP) [EC:2.7.1.107]
173	K17810	10480.8	-1.30652	0.325531	-4.01351	0.000241394	0.00752802	K17810 asl; D-aspartate ligase [EC:6.3.1.12]
174	K05739	2702.76	-2.8793	0.717434	-4.01334	0.000241524	0.00752802	K05739 seaA; uncharacterized protein
175	K09005	4011.56	-1.9276	0.480354	-4.01287	0.00024187	0.00752802	K09005 K09005; uncharacterized protein
176	K17076	6420.17	-1.08752	0.271298	-4.00858	0.000245061	0.00758451	K17076 lysY; putative lysine transport system ATP-binding protein
177	K10188	3525.86	1.86226	0.465387	4.00153	0.000250395	0.00765805	K10188 lacE, araN; lactose/L-arabinose transport system substrate-binding protein
178	K07231	26.3794	-3.80324	0.950822	-3.99995	0.000251608	0.00765805	K07231 K07231; putative iron-regulated protein
179	K07338	26.3794	-3.80324	0.950822	-3.99995	0.000251608	0.00765805	K07338 K07338; uncharacterized protein
180	K01818	10291.6	1.04502	0.26168	3.99349	0.000256623	0.00776778	K01818 fucI; L-fucose/D-arabinose isomerase [EC:5.3.1.25 5.3.1.3]
181	K09942	8.1135	-3.33459	0.835589	-3.99071	0.000258806	0.00779106	K09942 K09942; uncharacterized protein
182	K07306	3452.26	-1.57979	0.398615	-3.96319	0.000281447	0.00842658	K07306 dmsA; anaerobic dimethyl sulfoxide reductase subunit A [EC:1.8.5.3]
183	K16165	616.598	-2.70822	0.683973	-3.95955	0.000284588	0.00847457	K16165 nagK; fumarylpyruvate hydrolase [EC:3.7.1.20]
184	K19746	26.8968	-3.69861	0.936216	-3.9506	0.000292438	0.0086615	K19746 dauA; D-arginine dehydrogenase [EC:1.4.99.6]
185	K07588	15035	1.11927	0.284177	3.93864	0.000303257	0.00893393	K07588 argK; LAO/AO transport system kinase [EC:2.7.-.-]
186	K13100	2.27795	2	0.508535	3.93286	0.000308626	0.00904372	K13100 CWC22; pre-mRNA-splicing factor CWC22
187	K01274	135.453	2.71095	0.690223	3.92764	0.000313557	0.00913959	K01274 E3.4.13.-; D-alanyl-D-alanine dipeptidase [EC:3.4.13.-]
188	K11178	199.134	3.43352	0.875592	3.92137	0.000319575	0.00926599	K11178 yagS; xanthine dehydrogenase YagS FAD-binding subunit [EC:1.17.1.4]
189	K13281	2094.02	-2.24334	0.572781	-3.91658	0.000324251	0.00935236	K13281 uvsE, UVE1; UV DNA damage endonuclease [EC:3.-.-.-]
190	K19419	368.173	-3.75405	0.959891	-3.91091	0.000329872	0.00946493	K19419 epsG; transmembrane protein EpsG
191	K01646	5301.88	1.38259	0.353843	3.90736	0.000333439	0.00951769	K01646 citD; citrate lyase subunit gamma (acyl carrier protein)
192	K07313	6386	-1.18218	0.303029	-3.90122	0.000339695	0.00964629	K07313 pphA; serine/threonine protein phosphatase 1 [EC:3.1.3.16]
193	K06296	388.519	-2.06663	0.530338	-3.89682	0.000344244	0.00972534	K06296 gerKB; spore germination protein KB
194	K09138	366.055	-1.8392	0.473092	-3.88761	0.000353968	0.00994904	K09138 K09138; uncharacterized protein
195	K06027	7.95376	-3.30058	0.851265	-3.87727	0.000365203	0.0102127	K06027 NSF, SEC18; vesicle-fusing ATPase [EC:3.6.4.6]
196	K05516	7651.41	-1.14518	0.295877	-3.87048	0.000372766	0.0103716	K05516 cbpA; curved DNA-binding protein
197	K08965	253.283	3.02614	0.782318	3.86816	0.000375375	0.0103916	K08965 mtnW; 2,3-diketo-5-methylthiopentyl-1-phosphate enolase [EC:5.3.2.5]
198	K01975	4244.69	-1.28649	0.332979	-3.86358	0.000380602	0.0104837	K01975 thpR; RNA 2',3'-cyclic 3'-phosphodiesterase [EC:3.1.4.58]
199	K12240	67.4372	3.41119	0.887947	3.84166	0.000406582	0.0111233	K12240 pchF; pyochelin synthetase
200	K05565	13.5239	-2.38219	0.620264	-3.84061	0.000407861	0.0111233	K05565 mnhA, mrpA; multicomponent Na+:H+ antiporter subunit A
201	K16306	84.8579	3.44082	0.897086	3.83555	0.000414119	0.0112383	K16306 K16306; fructose-bisphosphate aldolase / 2-amino-3,7-dideoxy-D-threo-hept-6-ulosonate synthase [EC:4.1.2.13 2.2.1.10]
202	K02230	4030.65	1.90235	0.496495	3.83156	0.000419125	0.0113184	K02230 cobN; cobaltochelatase CobN [EC:6.6.1.2]
203	K06415	619.877	-3.18215	0.833345	-3.81853	0.00043585	0.0117127	K06415 spoVR; stage V sporulation protein R
204	K06446	342.047	-2.23377	0.585463	-3.8154	0.000439969	0.011766	K06446 DCAA; acyl-CoA dehydrogenase [EC:1.3.99.-]
205	K15654	69.8815	3.17153	0.832271	3.81069	0.000446222	0.0118755	K15654 srfAA, lchAA; surfactin family lipopeptide synthetase A
206	K02759	17560.3	-0.97447	0.256369	-3.80105	0.000459317	0.0121653	K02759 celC, chbA; cellobiose PTS system EIIA component [EC:2.7.1.196 2.7.1.205]
207	K02282	3646.35	-1.81737	0.47989	-3.78706	0.000478959	0.0126248	K02282 cpaE, tadZ; pilus assembly protein CpaE
208	K01579	14902.6	0.895621	0.237009	3.77884	0.000490885	0.0128776	K01579 panD; aspartate 1-decarboxylase [EC:4.1.1.11]
209	K00639	11100.4	1.02238	0.2709	3.77401	0.00049802	0.0129459	K00639 kbl, GCAT; glycine C-acetyltransferase [EC:2.3.1.29]
210	K12685	1058.08	-2.61552	0.693054	-3.7739	0.00049819	0.0129459	K12685 ssp; subtilase-type serine protease [EC:3.4.21.-]
211	K10190	4443.75	1.66207	0.440965	3.76916	0.000505292	0.0129717	K10190 lacG, araQ; lactose/L-arabinose transport system permease protein
212	K04767	5360.16	1.65605	0.439431	3.76863	0.000506105	0.0129717	K04767 acuB; acetoin utilization protein AcuB
213	K15921	268.463	-3.50721	0.930837	-3.7678	0.000507352	0.0129717	K15921 xynD; arabinoxylan arabinofuranohydrolase [EC:3.2.1.55]
214	K01751	9113.26	0.972331	0.25812	3.76698	0.000508603	0.0129717	K01751 E4.3.1.15; diaminopropionate ammonia-lyase [EC:4.3.1.15]
215	K00244	21710.2	-1.14684	0.306215	-3.74521	0.000542721	0.0137781	K00244 frdA; fumarate reductase flavoprotein subunit [EC:1.3.5.4]
216	K13671	37.8196	-2.68468	0.718306	-3.73751	0.00055531	0.0140249	K13671 K13671; alpha-1,2-mannosyltransferase [EC:2.4.1.-]
217	K13796	591.784	-2.59615	0.695001	-3.73546	0.000558704	0.0140249	K13796 cobZ, tcuA; tricarballylate dehydrogenase
218	K05873	697.712	-2.71378	0.726651	-3.73464	0.00056008	0.0140249	K05873 cyaB; adenylate cyclase, class 2 [EC:4.6.1.1]
219	K03821	63.3119	-3.52963	0.945553	-3.73287	0.000563037	0.0140352	K03821 phbC, phaC; polyhydroxyalkanoate synthase subunit PhaC [EC:2.3.1.-]
220	K09967	209.949	3.35524	0.899627	3.72959	0.000568564	0.0141091	K09967 K09967; uncharacterized protein
221	K00412	36.8151	-3.29445	0.884777	-3.72349	0.000578972	0.014303	K00412 CYTB, petB; ubiquinol-cytochrome c reductase cytochrome b subunit
222	K11177	40.1115	3.12932	0.842351	3.71499	0.000593779	0.0145384	K11177 yagR; xanthine dehydrogenase YagR molybdenum-binding subunit [EC:1.17.1.4]
223	K13483	40.1115	3.12932	0.842351	3.71499	0.000593779	0.0145384	K13483 yagT; xanthine dehydrogenase YagT iron-sulfur-binding subunit
224	K11712	2205.54	-2.83215	0.763075	-3.71149	0.000599972	0.014613	K11712 dctR; two-component system, LuxR family, response regulator DctR
225	K09776	12.3273	-2.9358	0.791262	-3.71028	0.000602133	0.014613	K09776 K09776; uncharacterized protein
226	K05882	12.6232	-2.74284	0.741278	-3.70015	0.000620513	0.014993	K05882 E1.1.1.91; aryl-alcohol dehydrogenase (NADP+) [EC:1.1.1.91]
227	K15270	590.038	-2.63583	0.713072	-3.69644	0.000627364	0.0150287	K15270 sam; S-adenosylmethionine uptake transporter
228	K02805	5249.18	1.09711	0.296804	3.6964	0.000627446	0.0150287	K02805 wecE, rffA; dTDP-4-amino-4,6-dideoxygalactose transaminase [EC:2.6.1.59]
229	K13282	611.311	-3.2149	0.870327	-3.6939	0.000632109	0.0150396	K13282 cphB; cyanophycinase [EC:3.4.15.6]
230	K11017	20.1154	3.06618	0.830215	3.69323	0.000633362	0.0150396	K11017 shlB, hhdB, hpmB; hemolysin activation/secretion protein
231	K04093	46.4656	2.9644	0.803289	3.69033	0.000638841	0.0150396	K04093 pheA1; chorismate mutase [EC:5.4.99.5]
232	K00311	36.3596	-3.29785	0.893907	-3.68925	0.000640877	0.0150396	K00311 ETFDH; electron-transferring-flavoprotein dehydrogenase [EC:1.5.5.1]
233	K10189	4555.69	1.56675	0.424725	3.68886	0.000641625	0.0150396	K10189 lacF, araP; lactose/L-arabinose transport system permease protein
234	K02760	18755.8	-0.976878	0.264919	-3.68746	0.000644282	0.0150396	K02760 celA, chbB; cellobiose PTS system EIIB component [EC:2.7.1.196 2.7.1.205]
235	K16267	590.181	-2.63627	0.715942	-3.68224	0.000654321	0.0152095	K16267 zipB; zinc and cadmium transporter
236	K06020	591.536	-2.63346	0.715533	-3.68042	0.000657857	0.0152275	K06020 ettA; energy-dependent translational throttle protein EttA
237	K01969	34.3735	-3.01098	0.819595	-3.67373	0.000670992	0.0154143	K01969 E6.4.1.4B; 3-methylcrotonyl-CoA carboxylase beta subunit [EC:6.4.1.4]
238	K03802	614.391	-3.16352	0.861182	-3.67347	0.000671523	0.0154143	K03802 cphA; cyanophycin synthetase [EC:6.3.2.29 6.3.2.30]
239	K00411	36.6097	-3.23988	0.884335	-3.66363	0.00069133	0.015803	K00411 UQCRFS1, RIP1, petA; ubiquinol-cytochrome c reductase iron-sulfur subunit [EC:7.1.1.8]
240	K08094	2823.87	1.96915	0.53819	3.65883	0.000701194	0.0159541	K08094 hxlB; 6-phospho-3-hexuloisomerase [EC:5.3.1.27]
241	K02574	2838.14	-1.36894	0.374271	-3.65761	0.000703728	0.0159541	K02574 napH; ferredoxin-type protein NapH
242	K03710	60139.5	-0.796932	0.218176	-3.65271	0.00071398	0.0161201	K03710 K03710; GntR family transcriptional regulator
243	K03405	3734.38	1.7858	0.489337	3.64943	0.000720915	0.0162103	K03405 chlI, bchI; magnesium chelatase subunit I [EC:6.6.1.1]
244	K00809	183.051	-3.33641	0.915279	-3.64524	0.000729871	0.0163135	K00809 DHPS, dys; deoxyhypusine synthase [EC:2.5.1.46]
245	K00613	386.826	-2.19123	0.60124	-3.64452	0.000731426	0.0163135	K00613 GATM; glycine amidinotransferase [EC:2.1.4.1]
246	K17836	19228.2	1.01398	0.278861	3.63616	0.000749663	0.0166528	K17836 penP; beta-lactamase class A [EC:3.5.2.6]
247	K07222	36.7215	3.07457	0.845897	3.63469	0.000752907	0.016656	K07222 K07222; putative flavoprotein involved in K+ transport
248	K03404	4047.51	1.79342	0.493596	3.63337	0.000755856	0.016656	K03404 chlD, bchD; magnesium chelatase subunit D [EC:6.6.1.1]
249	K13041	1380.44	-2.66963	0.735095	-3.63167	0.000759628	0.0166725	K13041 ttrR; two-component system, LuxR family, response regulator TtrR
250	K16907	917.221	2.93213	0.809111	3.62389	0.000777217	0.0169908	K16907 K16907; fluoroquinolone transport system ATP-binding protein [EC:7.6.2.-]
251	K13052	8651.61	1.06903	0.295712	3.61509	0.000797594	0.0173674	K13052 divIC, divA; cell division protein DivIC
252	K15022	588.073	-2.64403	0.734124	-3.60161	0.00082978	0.0179971	K15022 fdhB; formate dehydrogenase (NADP+) beta subunit [EC:1.17.1.10]
253	K02796	20506.7	-0.909236	0.252908	-3.59513	0.000845689	0.0182702	K02796 manZ; mannose PTS system EIID component
254	K09994	4184.81	-1.51718	0.422569	-3.59038	0.00085755	0.0183441	K09994 phnO; (aminoalkyl)phosphonate N-acetyltransferase [EC:2.3.1.280]
255	K15534	7.22006	2.2881	0.637295	3.59033	0.000857674	0.0183441	K15534 K15534; beta-D-galactosyl-(1->4)-L-rhamnose phosphorylase [EC:2.4.1.247]
256	K16906	387.199	2.76355	0.769842	3.58976	0.000859098	0.0183441	K16906 K16906; fluoroquinolone transport system permease protein
257	K02431	7954.29	1.00898	0.282293	3.57423	0.000899026	0.0191225	K02431 fucU, FUOM; L-fucose mutarotase [EC:5.1.3.29]
258	K10121	275.437	2.53595	0.710149	3.57101	0.000907547	0.0191308	K10121 K10121, msmF; fructooligosaccharide transport system permease protein
259	K10122	275.437	2.53595	0.710149	3.57101	0.000907547	0.0191308	K10122 K10122, msmG; fructooligosaccharide transport system permease protein
260	K00102	3158.44	-1.98702	0.556565	-3.57015	0.000909832	0.0191308	K00102 LDHD, dld; D-lactate dehydrogenase (cytochrome) [EC:1.1.2.4]
261	K19509	8266.72	-1.22144	0.342962	-3.56144	0.000933275	0.0195491	K19509 gfrD; fructoselysine/glucoselysine PTS system EIID component
262	K17835	59.8846	3.3235	0.93489	3.55497	0.000951054	0.0198461	K17835 griH; 3-amino-4-hydroxybenzoic acid synthase [EC:4.1.99.20]
263	K00459	1573.62	-1.71396	0.482357	-3.5533	0.00095568	0.0198596	K00459 ncd2, npd; nitronate monooxygenase [EC:1.13.12.16]
264	K06441	587.776	-2.64403	0.744616	-3.55086	0.000962517	0.0198596	K06441 E1.12.7.2G; ferredoxin hydrogenase gamma subunit [EC:1.12.7.2]
265	K18118	5383.66	1.57538	0.446036	3.53195	0.001017	0.0208278	K18118 aarC, cat1; succinyl-CoA:acetate CoA-transferase [EC:2.8.3.18]
266	K09796	37.3423	-2.85192	0.808391	-3.52789	0.00102908	0.020997	K09796 pccA; periplasmic copper chaperone A
267	K16149	11.3852	-3.1862	0.903553	-3.52631	0.00103383	0.0210161	K16149 K16149; 1,4-alpha-glucan branching enzyme [EC:2.4.1.18]
268	K05352	503.678	-2.7297	0.775229	-3.52115	0.00104943	0.0212549	K05352 tarJ; ribitol-5-phosphate 2-dehydrogenase (NADP+) [EC:1.1.1.405]
269	K04074	19340.2	-0.926922	0.263354	-3.51968	0.00105393	0.0212677	K04074 divIVA; cell division initiation protein
270	K15509	23.8228	2.91425	0.828883	3.51587	0.00106566	0.0213874	K15509 hpsN; sulfopropanediol 3-dehydrogenase [EC:1.1.1.308]
271	K09128	1046.69	2.42651	0.690284	3.51523	0.00106762	0.0213874	K09128 K09128; uncharacterized protein
272	K12071	741.212	-2.65735	0.756391	-3.5132	0.00107396	0.0214364	K12071 traD; conjugal transfer pilus assembly protein TraD
273	K03930	526.617	1.91373	0.545133	3.51057	0.00108218	0.0214502	K03930 estA; putative tributyrin esterase [EC:3.1.1.-]
274	K08352	631.503	-1.65002	0.470056	-3.51025	0.00108318	0.0214502	K08352 phsA, psrA; thiosulfate reductase / polysulfide reductase chain A [EC:1.8.5.5]
275	K15371	44.0811	-2.82727	0.805662	-3.50925	0.00108633	0.0214502	K15371 GDH2; glutamate dehydrogenase [EC:1.4.1.2]
276	K07812	2623.32	-1.73364	0.495112	-3.50151	0.00111097	0.0218584	K07812 torZ; trimethylamine-N-oxide reductase (cytochrome c) [EC:1.7.2.3]
277	K11927	17440.9	-0.938065	0.26809	-3.49907	0.00111887	0.0219354	K11927 rhlE; ATP-dependent RNA helicase RhlE [EC:3.6.4.13]
278	K00023	38.4109	-3.06084	0.876102	-3.4937	0.00113641	0.0222003	K00023 phbB; acetoacetyl-CoA reductase [EC:1.1.1.36]
279	K03769	5181	-1.05139	0.301866	-3.48297	0.00117223	0.0228191	K03769 ppiC; peptidyl-prolyl cis-trans isomerase C [EC:5.2.1.8]
280	K04756	20.4109	-2.52923	0.726568	-3.48106	0.00117872	0.0228648	K04756 ahpD; lipoyl-dependent peroxiredoxin subunit D [EC:1.11.1.28]
281	K01962	13919.1	-0.862209	0.24791	-3.47791	0.0011895	0.0229929	K01962 accA; acetyl-CoA carboxylase carboxyl transferase subunit alpha [EC:6.4.1.2 2.1.3.15]
282	K08641	6723.73	1.09614	0.316054	3.4682	0.00122331	0.0235637	K08641 vanX; zinc D-Ala-D-Ala dipeptidase [EC:3.4.13.22]
283	K09726	26.6079	-2.9478	0.85226	-3.45881	0.00125692	0.0241268	K09726 K09726; uncharacterized protein
284	K07723	1829.42	-2.0469	0.592348	-3.45557	0.00126872	0.0242687	K07723 ndoAI; CopG family transcriptional regulator / antitoxin EndoAI
285	K07399	16.0131	-2.11117	0.61177	-3.45092	0.00128582	0.0245106	K07399 resB, ccs1; cytochrome c biogenesis protein
286	K15733	7.65444	-2.40925	0.698708	-3.44815	0.00129611	0.0246215	K15733 E1.11.1.19; dye decolorizing peroxidase [EC:1.11.1.19]
287	K09935	3732.87	1.13833	0.330585	3.44337	0.00131407	0.024877	K09935 ybiA; N-glycosidase YbiA [EC:3.2.2.-]
288	K01615	23579.4	1.40684	0.4088	3.4414	0.00132152	0.0249324	K01615 gcdA; glutaconyl-CoA decarboxylase subunit alpha [EC:7.2.4.5]
289	K16146	14.7056	-2.43933	0.709153	-3.43978	0.00132769	0.0249633	K16146 pep2; maltokinase [EC:2.7.1.175]
290	K16905	533.804	2.80911	0.817626	3.4357	0.00134337	0.0251723	K16905 K16905; fluoroquinolone transport system permease protein
291	K06307	598.47	-3.08503	0.898695	-3.43279	0.00135464	0.0252974	K06307 yfkQ; spore germination protein
292	K04014	2310.55	-1.6619	0.484481	-3.43027	0.00136448	0.0253951	K04014 nrfC; protein NrfC
293	K06940	10550	0.748915	0.219334	3.4145	0.00142766	0.0264243	K06940 K06940; uncharacterized protein
294	K17330	98.3859	3.22385	0.944419	3.41358	0.00143142	0.0264243	K17330 dasB; N,N'-diacetylchitobiose transport system permease protein
295	K09123	1345.56	2.42856	0.711581	3.41291	0.00143417	0.0264243	K09123 lhpI; cis-L-3-hydroxyproline dehydratase [EC:4.2.1.171]
296	K12686	52.996	2.82425	0.828192	3.41013	0.00144562	0.026466	K12686 apeE, estA, lip-1; outer membrane lipase/esterase
297	K10041	4434.35	-1.3363	0.391873	-3.41003	0.00144604	0.026466	K10041 peb1C, glnQ; aspartate/glutamate/glutamine transport system ATP-binding protein [EC:7.4.2.1]
298	K00957	7092.52	0.95039	0.279293	3.40284	0.00147611	0.0269269	K00957 cysD; sulfate adenylyltransferase subunit 2 [EC:2.7.7.4]
299	K06975	15822.1	-0.798888	0.234878	-3.40128	0.00148271	0.0269579	K06975 K06975; uncharacterized protein
300	K14475	173.954	-2.36387	0.695676	-3.39795	0.00149694	0.0270452	K14475 ICP; inhibitor of cysteine peptidase

## Sheet: NOTES
Notes:
1. Data shown = Post-Op/Healthy (i.e Heathy is te denominator)
2. Data include all differentially abundant KOs (alpha < 0.05, adjusted P value =/< 0.001)
