# Supplementary material for: Alterations in co-abundant bacteriome in colorectal cancer and its persistence after surgery: a pilot study
Source: Sci Rep. 2022 Jun 14;12:9829. doi: 10.1038/s41598-022-14203-z (PMC9198081; doi:10.1038/s41598-022-14203-z)
Supplement: Supplementary file 7 — Supplementary Information 5. [file 41598_2022_14203_MOESM7_ESM.xlsx]

## Sheet: PATHWAYS
S/N	PATHWAYS	KOs
1	map01100 Metabolic pathways (7)	K00078 DHDH; dihydrodiol dehydrogenase / D-xylose 1-dehydrogenase (NADP) [EC:1.3.1.20 1.1.1.179]
		K01455 E3.5.1.49; formamidase [EC:3.5.1.49]
		K01771 plc; 1-phosphatidylinositol phosphodiesterase [EC:4.6.1.13]
		K01843 kamA; lysine 2,3-aminomutase [EC:5.4.3.2]
		K05299 fdhA; formate dehydrogenase (NADP+) alpha subunit [EC:1.17.1.10]
		K05304 NANS; sialic acid synthase [EC:2.5.1.56 2.5.1.57 2.5.1.132]
		K16649 glft1; rhamnopyranosyl-N-acetylglucosaminyl-diphospho-decaprenol beta-1,3/1,4-galactofuranosyltransferase [EC:2.4.1.287]
2	map02010 ABC transporters (2)	K13890 gsiC; glutathione transport system permease protein
		K17315 gtsA; glucose/mannose transport system substrate-binding protein
3	map01200 Carbon metabolism (2)	K01455 E3.5.1.49; formamidase [EC:3.5.1.49]
		K05299 fdhA; formate dehydrogenase (NADP+) alpha subunit [EC:1.17.1.10]
4	map00520 Amino sugar and nucleotide sugar metabolism (1)	K05304 NANS; sialic acid synthase [EC:2.5.1.56 2.5.1.57 2.5.1.132]
5	map00630 Glyoxylate and dicarboxylate metabolism (1)	K01455 E3.5.1.49; formamidase [EC:3.5.1.49]
6	map00071 Fatty acid degradation (1)	K05297 rubB; rubredoxin---NAD+ reductase [EC:1.18.1.1]
7	map00910 Nitrogen metabolism (1)	K01455 E3.5.1.49; formamidase [EC:3.5.1.49]
8	map01110 Biosynthesis of secondary metabolites (1)	K18221 tetX; tetracycline 11a-monooxygenase, tetracycline resistance protein [EC:1.14.13.231]
9	map00040 Pentose and glucuronate interconversions (1)	K00078 DHDH; dihydrodiol dehydrogenase / D-xylose 1-dehydrogenase (NADP) [EC:1.3.1.20 1.1.1.179]
10	map00720 Carbon fixation pathways in prokaryotes (1)	K05299 fdhA; formate dehydrogenase (NADP+) alpha subunit [EC:1.17.1.10]
	·
	·
	· map04112 Cell cycle - Caulobacter (1)
	·
	· ko:K13581 ccrM; modification methylase [EC:2.1.1.72]
	·
	· map00680 Methane metabolism (1)
	·
	· ko:K05299 fdhA; formate dehydrogenase (NADP+) alpha subunit [EC:1.17.1.10]
	·
	· map00460 Cyanoamino acid metabolism (1)
	·
	· ko:K01455 E3.5.1.49; formamidase [EC:3.5.1.49]
	·
	· map01120 Microbial metabolism in diverse environments (1)
	·
	· ko:K05299 fdhA; formate dehydrogenase (NADP+) alpha subunit [EC:1.17.1.10]
	·
	· map00310 Lysine degradation (1)
	·
	· ko:K01843 kamA; lysine 2,3-aminomutase [EC:5.4.3.2]
	·
	· map00562 Inositol phosphate metabolism (1)
	·
	· ko:K01771 plc; 1-phosphatidylinositol phosphodiesterase [EC:4.6.1.13]
	·
	· map00960 Tropane, piperidine and pyridine alkaloid biosynthesis (1)
	·
	· ko:K13607 fldA; cinnamoyl-CoA:phenyllactate CoA-transferase [EC:2.8.3.17]
	·
	· map00980 Metabolism of xenobiotics by cytochrome P450 (1)
	·
	· ko:K00078 DHDH; dihydrodiol dehydrogenase / D-xylose 1-dehydrogenase (NADP) [EC:1.3.1.20 1.1.1.179]
	·
	· map00253 Tetracycline biosynthesis (1)
	·
	· ko:K18221 tetX; tetracycline 11a-monooxygenase, tetracycline resistance protein [EC:1.14.13.231]
	·
	· map00572 Arabinogalactan biosynthesis - Mycobacterium (1)
	·
	· ko:K16649 glft1; rhamnopyranosyl-N-acetylglucosaminyl-diphospho-decaprenol beta-1,3/1,4-galactofuranosyltransferase [EC:2.4.1.287]
	·

## Sheet: BRITE
S/N	BRITE ENTRIES	KOs
1	ko01000 Enzymes (19)	ko:K00078 DHDH; dihydrodiol dehydrogenase / D-xylose 1-dehydrogenase (NADP) [EC:1.3.1.20 1.1.1.179]
		ko:K18221 tetX; tetracycline 11a-monooxygenase, tetracycline resistance protein [EC:1.14.13.231]
		ko:K05299 fdhA; formate dehydrogenase (NADP+) alpha subunit [EC:1.17.1.10]
		ko:K05297 rubB; rubredoxin---NAD+ reductase [EC:1.18.1.1]
		ko:K13581 ccrM; modification methylase [EC:2.1.1.72]
		ko:K16649 glft1; rhamnopyranosyl-N-acetylglucosaminyl-diphospho-decaprenol beta-1,3/1,4-galactofuranosyltransferase [EC:2.4.1.287]
		ko:K13002 wbyL; glycosyltransferase [EC:2.4.1.-]
		ko:K13678 cpoA; 1,2-diacylglycerol-3-alpha-glucose alpha-1,2-galactosyltransferase [EC:2.4.1.-]
		ko:K05304 NANS; sialic acid synthase [EC:2.5.1.56 2.5.1.57 2.5.1.132]
		ko:K13607 fldA; cinnamoyl-CoA:phenyllactate CoA-transferase [EC:2.8.3.17]
		ko:K01216 E3.2.1.73; licheninase [EC:3.2.1.73]
		ko:K13277 epr; minor extracellular protease Epr [EC:3.4.21.-]
		ko:K01455 E3.5.1.49; formamidase [EC:3.5.1.49]
		ko:K14440 SMARCAL1; SWI/SNF-related matrix-associated actin-dependent regulator of chromatin subfamily A-like protein 1 [EC:3.6.4.12]
		ko:K19050 hepA; heparin lyase [EC:4.2.2.7]
		ko:K19051 hepB; heparin/heparan-sulfate lyase [EC:4.2.2.7 4.2.2.8]
		ko:K19052 hepC; heparan-sulfate lyase [EC:4.2.2.8]
		ko:K01771 plc; 1-phosphatidylinositol phosphodiesterase [EC:4.6.1.13]
		ko:K01843 kamA; lysine 2,3-aminomutase [EC:5.4.3.2]
2	ko01003 Glycosyltransferases (2)	ko:K13678 cpoA; 1,2-diacylglycerol-3-alpha-glucose alpha-1,2-galactosyltransferase [EC:2.4.1.-]
		ko:K16649 glft1; rhamnopyranosyl-N-acetylglucosaminyl-diphospho-decaprenol beta-1,3/1,4-galactofuranosyltransferase [EC:2.4.1.287]
3	ko02048 Prokaryotic defense system (1)	ko:K13581 ccrM; modification methylase [EC:2.1.1.72]
4	ko03051 Proteasome (1)	ko:K13572 pafB; proteasome accessory factor B
5	ko01504 Antimicrobial resistance genes (1)	ko:K18221 tetX; tetracycline 11a-monooxygenase, tetracycline resistance protein [EC:1.14.13.231]
6	ko03110 Chaperones and folding catalysts (1)	ko:K13277 epr; minor extracellular protease Epr [EC:3.4.21.-]
7	ko01005 Lipopolysaccharide biosynthesis proteins (1)	ko:K13002 wbyL; glycosyltransferase [EC:2.4.1.-]
8	ko03036 Chromosome and associated proteins (1)	ko:K14440 SMARCAL1; SWI/SNF-related matrix-associated actin-dependent regulator of chromatin subfamily A-like protein 1 [EC:3.6.4.12]
9	ko04812 Cytoskeleton proteins (1)	ko:K06990 MEMO1; MEMO1 family protein
10	ko01002 Peptidases and inhibitors (1)	ko:K13277 epr; minor extracellular protease Epr [EC:3.4.21.-]

## Sheet: MODULES
S/N	MODULES	KOs
1	M00377 Reductive acetyl-CoA pathway (Wood-Ljungdahl pathway) (1)	ko:K05299 fdhA; formate dehydrogenase (NADP+) alpha subunit [EC:1.17.1.10]

## Sheet: RAW_DATA_KOs
S/N	KOs	baseMean	log2FoldChange	lfcSE	stat	pvalue	padj	Descriptions
1	K13277	582.573	-5.85866	0.879187	-6.66373	3.54495e-05	0.195291	K13277 epr; minor extracellular protease Epr [EC:3.4.21.-]
2	K14440	351.064	-5.36207	0.907632	-5.90776	0.000101964	0.210215	K14440 SMARCAL1, HARP; SWI/SNF-related matrix-associated actin-dependent regulator of chromatin subfamily A-like protein 1 [EC:3.6.4.12]
3	K06990	160.884	-4.93234	0.876039	-5.63027	0.000153242	0.210215	K06990 MEMO1; MEMO1 family protein
4	K05297	691.56	-4.93714	0.878941	-5.61714	0.000156267	0.210215	K05297 rubB, alkT; rubredoxin---NAD+ reductase [EC:1.18.1.1]
5	K13678	528.507	2.64894	0.492172	5.38214	0.000222629	0.210215	K13678 cpoA; 1,2-diacylglycerol-3-alpha-glucose alpha-1,2-galactosyltransferase [EC:2.4.1.-]
6	K13572	196.392	2.34524	0.45723	5.12922	0.000328708	0.210215	K13572 pafB; proteasome accessory factor B
7	K13607	57.1683	-4.02926	0.795063	-5.06785	0.000361803	0.210215	K13607 fldA; cinnamoyl-CoA:phenyllactate CoA-transferase [EC:2.8.3.17]
8	K01771	88.4185	-3.58548	0.73728	-4.86312	0.000500173	0.210215	K01771 plc; 1-phosphatidylinositol phosphodiesterase [EC:4.6.1.13]
9	K05304	52.1553	-3.68401	0.760783	-4.84239	0.000517017	0.210215	K05304 NANS, SAS; sialic acid synthase [EC:2.5.1.56 2.5.1.57 2.5.1.132]
10	K08222	57.1862	-3.26692	0.681603	-4.79299	0.000559607	0.210215	K08222 yqgE; MFS transporter, YQGE family, putative transporter
11	K13890	3388.94	1.39856	0.293658	4.76255	0.000587684	0.210215	K13890 gsiC; glutathione transport system permease protein
12	K13002	1654.67	-3.76049	0.809802	-4.64372	0.000712326	0.210215	K13002 wbyL; glycosyltransferase [EC:2.4.1.-]
13	K19051	96.1402	-3.95725	0.859723	-4.60293	0.000761275	0.210215	K19051 hepB; heparin/heparan-sulfate lyase [EC:4.2.2.7 4.2.2.8]
14	K13581	1794.94	-3.8086	0.835262	-4.55977	0.000816954	0.210215	K13581 ccrM; modification methylase [EC:2.1.1.72]
15	K16649	297.767	-3.90697	0.862639	-4.52909	0.000859113	0.210215	K16649 glft1; rhamnopyranosyl-N-acetylglucosaminyl-diphospho-decaprenol beta-1,3/1,4-galactofuranosyltransferase [EC:2.4.1.287]
16	K17315	245.893	3.53658	0.786747	4.49519	0.000908375	0.210215	K17315 gtsA, glcE; glucose/mannose transport system substrate-binding protein
17	K08981	187.694	1.59643	0.361444	4.4168	0.00103398	0.210215	K08981 K08981; putative membrane protein
18	K19050	181.651	-3.18863	0.723348	-4.40815	0.00104891	0.210215	K19050 hepA; heparin lyase [EC:4.2.2.7]
19	K18221	50.4595	-3.51124	0.807617	-4.34766	0.0011599	0.210215	K18221 tetX; tetracycline 11a-monooxygenase, tetracycline resistance protein [EC:1.14.13.231]
20	K00078	230.46	3.90041	0.908954	4.29109	0.00127482	0.210215	K00078 DHDH; dihydrodiol dehydrogenase / D-xylose 1-dehydrogenase (NADP) [EC:1.3.1.20 1.1.1.179]
21	K01216	301.679	-3.69068	0.86014	-4.2908	0.00127545	0.210215	K01216 E3.2.1.73; licheninase [EC:3.2.1.73]
22	K01455	231.159	3.90044	0.909479	4.28865	0.00128004	0.210215	K01455 E3.5.1.49; formamidase [EC:3.5.1.49]
23	K01843	3376.04	-1.17398	0.27481	-4.27198	0.0013163	0.210215	K01843 kamA; lysine 2,3-aminomutase [EC:5.4.3.2]
24	K19052	441.486	-3.30366	0.775942	-4.25761	0.00134841	0.210215	K19052 hepC; heparan-sulfate lyase [EC:4.2.2.8]
25	K05299	27.6114	-3.09459	0.733491	-4.21899	0.00143883	0.210215	K05299 fdhA; formate dehydrogenase (NADP+) alpha subunit [EC:1.17.1.10]

## Sheet: NOTES
Notes:
1. Data shown = Post-Op/Pre-Op (i.e Pre-Op is the denominator)
2. Data include all differentially abundant KOs (alpha < 0.05)
